1 TITLE: *Chlamydomonas* sp. UWO241 exhibits constitutively high cyclic electron flow and  
2 rewired metabolism under high salinity.

3

4 Isha Kalra<sup>a</sup>, Xin Wang<sup>a</sup>, Marina Cvetkovska<sup>c</sup>, Jooyeon Jeong<sup>b</sup>, William McHargue<sup>b</sup>, Ru Zhang<sup>b</sup>,  
5 Norman Hüner<sup>d</sup>, Joshua S. Yuan<sup>e</sup>, and Rachael Morgan-Kiss<sup>a1,2</sup>

6

7 <sup>a</sup> Department of Microbiology, Miami University, Oxford, Ohio 45056

8 <sup>b</sup> Donald Danforth Plant Science Center, St. Louis, Missouri 63132

9 <sup>c</sup> Department of Biology, University of Ottawa, Ottawa, Ontario, Canada

10 <sup>d</sup> Department of Biology and The Biotron Centre for Experimental Climate Change, University  
11 of Western Ontario, London, Ontario, Canada

12 <sup>e</sup> Department of Plant Pathology and Microbiology, Texas A&M University, College Station,  
13 Texas 77840

14 Author Contributions

15 IK and RMK conceived of and designed the experiments; RMK supervised the experiments; IK  
16 performed growth physiology, fluorescence, sucrose density gradient experiments; XW and JSY  
17 performed and analyzed proteome experiments; JJ and IK performed the in vivo spectroscopy  
18 measurements using IDEASpec, JJ analyzed the IDEASpec data, WM optimized the spectroscopy  
19 measurements using IDEASpec, RZ supervised and designed the spectroscopy measurements  
20 using IDEASpec; MC and NH performed and analyzed metabolome experiments; IK and RMK  
21 wrote the article with contributions of all the authors; RMK agrees to serve as the author  
22 responsible for contact and ensures communication.

23 <sup>1</sup> Author for contact: [morganr2@miamioh.edu](mailto:morganr2@miamioh.edu)

24 <sup>2</sup> Senior author.

25

26 Running head: CEF and carbon metabolism under high salinity stress

27 **ABSTRACT**

28  
29 The Antarctic green alga *Chlamydomonas* sp. UWO241 (UWO241) was isolated from the deep  
30 photic zone of a permanently Antarctic ice-covered lake. Adaptation to permanent low  
31 temperatures, hypersalinity, and extreme shade has resulted in survival strategies in this  
32 halotolerant psychrophile. One of the most striking phenotypes of UWO241 is an altered  
33 photosystem I (PSI) organization and constitutive PSI cyclic electron flow (CEF). To date, little  
34 attention has been paid to CEF during long-term stress acclimation and the consequences of  
35 sustained CEF in UWO241 are not known. In this study, we combined photobiology,  
36 proteomics, and metabolomics to understand the underlying role of sustained CEF in high  
37 salinity stress acclimation. High salt-grown UWO241 exhibited increased thylakoid proton  
38 motive flux and an increased capacity for NPQ. A Bestrophin-like  $\text{Cl}^-$  channel was identified in  
39 the whole cell proteomes and transcriptome of UWO241 which likely supports ion homeostasis  
40 during high transthylakoid pH. Under high salt, a significant proportion of the upregulated  
41 enzymes were associated with the Calvin Benson Bassham Cycle (CBB), secondary metabolite  
42 biosynthesis, and protein translation. Two key enzymes of the Shikimate pathway, DAHP  
43 synthase and chorismate synthase, were also upregulated, as well as indole-3-glycerol phosphate  
44 synthase, an enzyme involved in biosynthesis of L-tryptophan and indole acetic acid. In addition,  
45 several compatible solutes (glycerol, proline and sucrose) accumulated to high levels in high salt-  
46 grown UWO241 cultures. We suggest that UWO241 maintains constitutively high CEF with  
47 associated PSI-cytb<sub>6</sub>f supercomplex to support robust growth and strong photosynthetic capacity  
48 under a constant growth regime of low temperatures and high salinity.

49

50

51 **INTRODUCTION**

52

53 During photosynthesis light is transduced into stored energy through two major pathways, linear  
54 electron flow (LEF) and cyclic electron flow (CEF). LEF involves the flow of electrons from  
55 Photosystem II (PSII) to Photosystem I (PSI) resulting in the production of both ATP and  
56 NADPH, which are consumed during carbon fixation in the Calvin Benson Bassham cycle  
57 (CBB). CBB requires 3 molecules of ATP and 2 molecules NADPH to fix 1 molecule of CO<sub>2</sub>;  
58 however, LEF produces an ATP:NADPH ratio of only 2.57:2 (Kramer and Evans, 2011). CEF  
59 constitutes electron transfer from PSI to soluble mobile carriers and back to PSI via cytochrome  
60 b<sub>6</sub>f (cyt b<sub>6</sub>f) and plastocyanin (Cardol et al., 2011; Nawrocki et al., 2019). As electrons are  
61 shuttled between PSI and cyt b<sub>6</sub>f, a proton gradient is produced that leads to ATP production  
62 only. In addition to satisfying the ATP shortage for efficient carbon fixation, CEF-generated  
63 ATP may be used for other energy-requiring processes, such as the CO<sub>2</sub>-concentrating  
64 mechanism of C<sub>4</sub> photosynthesis (Takabayashi et al., 2005; Ishikawa et al., 2016), N<sub>2</sub> fixation in  
65 cyanobacteria heterocysts (Magnuson et al., 2011; Magnuson and Cardona, 2016), and survival  
66 under environmental stress (Suorsa, 2015).

67       When the light harvesting antennae absorb light energy in excess of what is required for  
68 growth and metabolism, energy homeostasis is disrupted, increasing the risk of formation of  
69 reactive oxygen species (ROS) (Hüner et al., 1998). While this phenomenon is associated with  
70 excess light, numerous environmental stresses can lead to imbalances in energy demands,  
71 including high and low temperatures, high salinity, and nutrient deficiency. Moreover, the  
72 duration of the environmental stress can vary over broad time scales, from a few minutes to days  
73 or years. Survival of plants and algae requires coordination of short- and long-term acclimatory  
74 strategies to maintain energy homeostasis. These acclimation responses are often triggered via

75 the redox status of the plastoquinone pool and initiation of retrograde signaling between the  
76 chloroplast and the nucleus (Pfannschmidt, 2003).

77 CEF is generally accepted as a major pathway utilized under short-term stress by rapidly  
78 inducing a transthylakoid pH change and triggering nonphotochemical energy dissipation  
79 (Lucker and Kramer, 2013; Yamori et al., 2016b). Early reports linked initiation of CEF with  
80 induction of a state transition and formation of a PSI supercomplex (Iwai et al., 2010).  
81 Previously, it was assumed that CEF was dependent upon state transitions; however, more  
82 recently Takahashi et al. (2013) reported that CEF can initiate in the absence of state transitions.  
83 These authors showed that CEF is sensitive to the redox status of intersystem electron transport  
84 pool, while Kramer and colleagues showed that hydrogen peroxide acts as a signal for CEF  
85 initiation in *Arabidopsis thaliana* (Strand et al., 2015). These previous studies have generally  
86 assumed a main role for CEF under short-term, transient stress conditions, while reports of  
87 sustained CEF in response to long-term stress are lacking (Lucker and Kramer, 2013).

88 While the CEF mechanism is not fully understood, formation of protein supercomplexes  
89 has been associated with CEF initiation (Minagawa, 2016). The first stable supercomplex was  
90 isolated in 2010 by Iwai et al. in *Chlamydomonas reinhardtii*, under short-term exposure to  
91 dark/anaerobiosis. This supercomplex is composed of PSI, LHCII, cytochrome b<sub>6</sub>f, PGRL1 and  
92 FNR (Ferredoxin NADP Reductase) (Iwai et al., 2010). Takahashi and colleagues (2013)  
93 identified another supercomplex in *C. reinhardtii* that is formed under conditions of anoxia and  
94 is regulated through the calcium sensing protein, CAS. Recently, the structure of the *C.*  
95 *reinhardtii* PSI supercomplex was solved which showed that dissociation of specific LHCI  
96 proteins (Lhca2 and Lhca9) are necessary prior to PSI supercomplex formation (Steinbeck et al.,  
97 2018).

98           Around the globe, there are communities of photosynthetic organisms that have adapted  
99   to capture light energy and fix carbon under environmental conditions which are untenable for  
100 most model plant and algal species (Dolhi et al., 2013). One example of a prevalent stressful  
101 habitat is permanent low temperatures, which encompass the Arctic, Antarctic and alpine  
102 environments (Morgan-Kiss et al., 2006). The McMurdo (MCM) Dry Valleys are a large  
103 expanse of ice-free land, which forms the largest polar desert on the Antarctic continent. A  
104 network of permanently ice-covered lakes provides oases for microbial communities that are  
105 vertically stratified through the water column (Priscu et al., 1999; Morgan-Kiss et al., 2006).  
106 During the short austral summer, microalgal communities capture light energy and fix carbon,  
107 despite numerous permanent environmental stresses, including low temperatures, nutrient  
108 deficiency, super-saturated oxygen levels, and hypersalinity (Morgan-Kiss et al., 2006).  
109 *Chlamydomonas* sp. UWO241 (UWO241) was isolated from one of the highly studied dry valley  
110 lakes (Lake Bonney, east lobe) by J. Priscu and colleagues in the 1990s (Neale and Priscu, 1990;  
111 1995). In its native environment, UWO241 is exposed to year-round low temperatures (0°– 5°C),  
112 hypersalinity (700 mM NaCl), and extreme shade (<20  $\mu\text{mol photons m}^{-2} \text{s}^{-1}$ ) of a narrow  
113 spectral range (350 – 450 nm).

114           Early studies on UWO241 focused on growth physiology and its photosynthetic  
115 apparatus (Morgan et al., 1998). Most notably, UWO241 appeared to exhibit permanent  
116 downregulation of PSI, estimated by a weak P700 photooxidation and an absence of a  
117 discernable PSI Chl a low temperature (77K) fluorescence emission peak under a range of  
118 treatments (Morgan-Kiss et al., 2002a; 2005; Szyszka et al., 2007; Cook et al., 2019). Earlier  
119 reports also suggested that UWO241 appeared to have lost the ability to phosphorylate LHCII  
120 and undergo state transitions (Morgan-Kiss et al., 2002b). More recently Szyszka-Mroz et al.

121 (2019) used <sup>33</sup>P-labelling to show that UWO241 exhibits some LHCII phosphorylation which is  
122 distinct from that of *C. reinhardtii*. The authors also discovered cold adapted forms of the  
123 thylakoid protein kinases, STT7 and Stl1, in the psychrophile. Last, they suggested that  
124 UWO241 may rely on a constitutive capacity for energy spillover rather than inducible state  
125 transitions to regulate energy distribution between PSI and PSII (Szyszka-Mroz et al., 2019).

126 Recent studies have reported that UWO241 maintains sustained CEF under steady-state  
127 growth conditions (Szyszka-Mroz et al., 2015; Cook et al., 2019). Constitutively high CEF may  
128 represent an adaptive strategy in UWO241 to survive permanent environmental stress, such as  
129 low temperatures and high salinity. Hüner and colleagues (Szyszka-Mroz et al., 2015)  
130 demonstrated that during growth under high salinity (700 mM NaCl), UWO241 forms a stable  
131 PSI supercomplex. The supercomplex was only detectable in cultures acclimated to high salinity,  
132 and its stability was disrupted in the presence of the kinase inhibitor, staurosporine.

133 Why does UWO241 maintain high rates of CEF? On a transitory basis, it is known that  
134 CEF is used to satisfy short-term energy needs or to provide pmf to protect PSII by rapid  
135 downregulation and induction of qE. However, it is unknown if the consequences of CEF  
136 described thus far apply to an organism which appears to utilize CEF on a long-term basis to  
137 survive permanent stress. Here, we investigated whether CEF is used for photoprotection or  
138 energy generations in UWO241, and also examined the effects of sustained CEF on downstream  
139 carbon metabolism.

140

## 141 **RESULTS**

142 **UWO241 possesses constitutively high rates of CEF.**

143 UWO241 was isolated from the deep photic zone (17 m sampling depth) of the hypersaline,  
144 perennially ice-covered lake (Lake Bonney, McMurdo Dry Valleys, Victoria Land) (Neale and  
145 Priscu, 1990; Neale and Priscu, 1995). As a consequence of more than two decades of study, this  
146 photopsychrophile has emerged as a model for photosynthetic adaptation to permanent low  
147 temperatures (Morgan-Kiss et al., 2006; Dolhi et al., 2013; Cvetkovska et al., 2017). In addition  
148 to psychrophily, UWO241 exhibits robust growth and photosynthetic performance under high  
149 salt (0.7 M NaCl, Supplemental Fig. S1; Morgan et al., 1998; Pocock et al., 2011).

150         Low temperature fluorescence spectra of mid-log phase cultures of *C. reinhardtii* and  
151 UWO241 grown in control, low salt (LS) growth medium (standard BBM medium, 0.43 mM  
152 NaCl) under optimal growth temperatures (20°C and 8°C, respectively) and light conditions (100  
153  $\mu\text{mol m}^{-2}\text{s}^{-1}$  for both algae) confirmed that *C. reinhardtii* possesses a typical 77K fluorescence  
154 emission spectrum with prominent peaks at 685 nm ( $F_{685}$ ) and 715 nm ( $F_{715}$ ), representing  
155 LHCII-PSII and PSI, respectively. In agreement with past reports (Morgan et al., 1998; Szyszka  
156 et al., 2007), PSI fluorescence was significantly reduced (1.60-fold) in UWO241 relative to *C.*  
157 *reinhardtii* grown under optimal temperature/light conditions in the LS growth medium (Fig.  
158 1A). Moreover, PSI fluorescence was reduced by an additional 1.59-fold in cultures of UWO241  
159 grown in high salinity (HS) growth medium (0.7 M NaCl), relative to LS-grown cells (Fig. 1A).

160         PSI activity was monitored by far red (FR) light inducible P700 photooxidation (Fig. 1B).  
161 Following a rise in absorbance at 820 ( $A_{820}$ ), reflecting FR-induced P700 oxidation, we  
162 compared rates of P700 re-reduction in the dark in LS cultures of *C. reinhardtii* as well as LS-  
163 and HS-grown cells of UWO241 (Fig. 1B). Since FR preferentially excites PSI and not PSII,  
164 reduction of P700 following FR exposure is mainly due to alternative electron donors (Ivanov et  
165 al., 1998). In agreement with other reports (Morgan-Kiss et al., 2002b; Cook et al., 2019),



166 UWO241 grown in standard LS growth medium exhibited a significantly shorter re-reduction  
167 time for P700+ ( $t_{1/2}^{red}$ ) compared with LS-grown *C. reinhardtii* (Fig. 1B). Moreover, HS-grown  
168 UWO241 exhibited a 4.4-fold faster  $t_{1/2}^{red}$  compared with LS-grown cultures ( $43 \pm 42$  vs.  $188 \pm 52$   
169 ms respectively; Fig. 1B). These data indicate that relative to the model *C. reinhardtii*, UWO241  
170 exhibits a high capacity for PSI-driven CEF, which is further enhanced during acclimation to  
171 long-term high salinity stress.

172 Higher rates of CEF in HS-grown UWO241 were also confirmed by electrochromic shift  
173 (ECS) kinetics which estimates transthylakoid proton flux driven by light-dependent  
174 photosynthesis (Fig. 2, Supplemental Fig. S2). The ECS signal was measured by the change in  
175 absorbance of thylakoid pigments at 520 nm during application of light dark interval (Baker et  
176 al., 2007). The total amplitude of ECS signal ( $ECS_t$ ), , was used to estimate the total proton  
177 motive force (pmf) across thylakoid membranes (Kramer et al., 2003). UWO241 grown in HS  
178 exhibited 6 to 7.5 fold higher  $ECS_t$  than that of LS-grown cells under all light intensities (Fig.  
179 2A), suggesting HS-grown cells generate higher pmf than LS-grown cells at the same light  
180 intensity. High pmf can be caused by either increased proton flux from LEF or CEF, reduced  
181 proton efflux, or decreased ATP synthase activity (Kanazawa and Kramer, 2002; Livingston et  
182 al., 2010; Carrillo et al., 2016). To verify which process(es) were contributing to high pmf in HS-  
183 grown cells, proton conductance ( $g_{H^+}$ ) and fluxes through ATP synthase activity ( $v_{H^+}$ ) were  
184 analyzed. The inverse of the lifetime of the rapid decay of ECS ( $g_{H^+}$ ) represents proton  
185 permeability or conductivity of the thylakoid membrane and is largely dependent on the activity  
186 of ATP synthesis (Supplemental Fig. S2D; Baker et al., 2007). The  $g_{H^+}$  of HS-grown cells was  
187 ~50 to 60% of that of LS-grown cells (Figure 2B); however, the proton flux rate ( $v_{H^+}$ ) showed  
188 that the amount of ATP produced was still higher in HS-grown cells (Fig. 2C). The relationship

189 between  $v_{H+}$  and LEF can be used to estimate proton contribution from CEF (Baker et al., 2007).  
190 In the linear plots of  $v_{H+}$  versus LEF, the slope of the HS-grown cells was higher than that of LS-  
191 grown cells (Fig. 2D), indicating that CEF contributes significantly to the total proton exffluxes  
192 ( $v_{H+}$ ) in HS-grown cells. In close agreement with our P700 findings, UWO241-HS exhibited  
193 higher rates of CEF compared to UWO241-LS (Figs 1B and 2D; 4.33- and 4.5-fold higher in  
194 HS-UWO241 based on P700 and ECS measurements, respectively). Last, HS-grown cells  
195 exhibited downregulation of PSII and increased capacity for NPQ (Supplemental Fig. S2A and  
196 B), while PSI photochemical yield ( $Y[PSI]$ ) was higher HS- vs. LS-grown cells due to reduced  
197 PSI acceptor side limitation ( $Y[NA]$ ) (Supplemental Fig. S3).

198

#### 199 **Isolation of a PSI-supercomplex in UWO241.**

200 Formation of PSI-supercomplexes have been shown to be essential for induction of CEF in  
201 plants and algae (DalCorso et al., 2008; Iwai et al., 2010). An earlier report showed that high  
202 salinity-acclimated cultures of UWO241 form a PSI supercomplex (UWO241-SC); however, the  
203 yield of the UWO241-SC from fractionated thylakoids was relatively low and only a few  
204 proteins were identified (Szyszka-Mroz et al., 2015). In agreement with this report, the sucrose  
205 gradient from thylakoids isolated from LS-UWO241 had 3 distinct bands corresponding to major  
206 LHCII (Band 1), PSII core complex (Band 2) and PSI-LHCI (Fig. 3A). In contrast, UWO241-HS  
207 thylakoids lacked a distinct PSI-LHCI band, but exhibited several heavier bands, including the  
208 UWO241-SC band (Band 4; Fig. 3B). We significantly improved recovery of the UWO241-SC  
209 by solubilizing thylakoids with the detergent  $\alpha$ -DDM rather than  $\beta$ -DDM, which was used by  
210 other groups (Fig. 3B). Formation of band 4 of *C. reinhardtii* thylakoids isolated from State 2  
211 conditions, was more diffuse compared to the UWO241-SC (Fig. 3D).

212 Low-temperature fluorescence spectra were analyzed for the four bands extracted from  
213 the sucrose density gradients shown in Fig. 3B and D (i.e. HS-UWO241 and State 2 *C.*  
214 *reinhardtii*, respectively). In *C. reinhardtii*, Band 1 exhibited a major emission peak at 680 nm  
215 (Fig. 4C), corresponding to fluorescence from LHCII (Krause and Weis, 1991). Band 2 exhibited  
216 emission peak at 685 nm, consistent with PSII core (Fig. 4A). Band 3 exhibited a peak at 685 nm  
217 and a strong peak at 715 nm; the latter consistent with PSI-LHCI (Fig. 4A). However, Band 4  
218 exhibited a strong fluorescence peak at 680 nm and a minor peak at 715 nm (Fig. 4A).

219 Fractionated thylakoids from HS-grown UWO241 exhibited emission spectra for Band 1  
220 and Band 2 which were comparable with that from *C. reinhardtii* (Fig. 4B). In contrast, both  
221 Band 3 and Band 4 (PSI and SC bands, respectively) exhibited highly reduced or a lack  
222 fluorescence associated with PSI. However, we confirmed the presence of the PSI reaction center  
223 protein, PsaA, in the UWO241-SC by immunoblotting (Fig. 4C).

224

### 225 **Protein composition of the supercomplex.**

226 Protein components of the UWO241-SC were analyzed using LC-MS/MS. We identified a total  
227 of 39 proteins in the isolated band 4, significantly more proteins than the previously reported  
228 supercomplex of UWO241 isolated using  $\beta$ -DDM (Szyszka-Mroz et al., 2015). The most  
229 abundant proteins in the supercomplex were proteins of the PSI reaction center and cytochrome  
230  $b_6f$ . In total we identified seven out of 13 subunits of PSI reaction center (Table 1; Supplemental  
231 Table S1). Only two LHCI subunits, Lhca3 and Lhca5, and one LHCII minor subunit, CP29  
232 were associated with the UWO241-SC. The Calcium sensing receptor (CAS) was identified as  
233 the third most abundant protein in the UWO241-SC. We also identified four subunits of ATP

234 synthase in the UWO241-SC ( $\alpha$ ,  $\beta$ ,  $\gamma$ ,  $\delta$ ). In agreement with an earlier report, we found FtsH and  
235 PsbP in the UWO241-SC band (Szyszka-Mroz et al., 2015).

236 Bands 3 and 4 contained many PSI core proteins but lacked almost all Lhca proteins  
237 (Supplemental Table S1). These results agreed with an earlier report that failed to detect most  
238 Lhca proteins in UWO241 thylakoids (Morgan et al., 1998). To determine whether the absence  
239 of Lhcas in the UWO241 proteome was due to a loss of Lhca genes, we searched a UWO241  
240 transcriptome generated from a culture grown under low temperature/high salinity (Raymond et  
241 al., 2009). Surprisingly, we identified 9 Lhca homologues which were transcribed under high  
242 salinity, suggesting that all or most of the LHCI genes are expressed in UWO241 (Supplemental  
243 Fig. S4).

244

#### 245 **Expression of a Bestrophin-like transporter.**

246 A recent report detected expression of a bestrophin-like anion channel protein in whole cell  
247 proteomes of UWO241 (Cook et al., 2019). A search of the UWO241 transcriptome revealed  
248 two homologues that were related to other algae and plant BEST1 proteins (Fig. 5A). Both  
249 UWO241 BEST1 homologues (contig 864 and 973) contain four putative transmembrane  
250 domains (Fig. 5B and C). Contig 864 possesses a putative chloroplast transit peptide and  
251 cleavage site, suggesting that it is localized to the chloroplast. Modeling of the UWO241 BEST1  
252 protein using KpBest as a template, indicated that the UWO241 BEST channel may form a  
253 pentamer, with the Cl<sup>-</sup> entryway and exit is located on the stromal and luminal sides, respectively  
254 of the thylakoid membrane (Fig. 5D), similar to a recent study on AtBEST1 (Duan et al., 2016).

255

#### 256 **Whole cell proteome analysis.**

257 We wondered whether constitutively high CEF could be linked to changes in downstream  
258 metabolism in UWO241. To address this question, whole-cell proteomes extracted from cultures  
259 of UWO241-HS and -LS grown under optimal temperature/light conditions were compared.  
260 Overall 98 proteins from various functional categories were identified as significantly affected in  
261 the two treatments, out of which 46 were upregulated and 62 downregulated in HS-acclimated  
262 cells. Proteins associated with photosynthesis (18%) and translational machinery (18%) were  
263 most affected in the treatment followed by primary and secondary metabolism (16%)  
264 (Supplemental Fig. S5).

265

266 Photosynthesis: Differentially regulated proteins participating in photosynthesis were identified  
267 in UWO241-HS. Three photosystem reaction center proteins, PsaB and PsaN of PSI, and D2  
268 protein of PSII, as well as extrinsic proteins of the water oxidizing complex, PsbO and PsbQ,  
269 were downregulated in UWO241-HS (Figs. 6 and 7A; Supplemental Table S2). One protein of  
270 chloroplastic ATP synthase, the epsilon subunit, was upregulated (3.8 fold) in UWO241-HS.  
271 Last, both FtsH proteins that were detected in the UWO241-SC, FtsH1 and FtsH2, were  
272 upregulated in UWO241-HS (Table 1; Supplemental Table S2).

273 Several proteins associated with the CBB were significantly upregulated in UWO241-HS  
274 cells (Figs. 6 and 7A; Supplemental Table S2). The RubisCO large subunit was upregulated in  
275 UWO241-HS, along with two chaperone proteins involved in RubisCO assembly, RuBA and  
276 RuBB. A class 2 fructose-1,6 –bisphosphatase (FBPase) was the third highest upregulated  
277 protein (5-fold), and fructose bisphosphate aldolase and transketolase were also upregulated in  
278 UWO241-HS (Fig. 7A).

279

280 *Metabolism:* The TCA cycle protein aconitate hydratase was upregulated in UWO241-HS, while  
281 pyruvate carboxylase, which is involved in anaplerotic reactions, was downregulated (Fig. 7B;  
282 Supplemental Tables S2 and S3). In addition, malate dehydrogenase (MDH) was downregulated  
283 in UWO241-HS. MDH participates in the malate shunt and helps shuttle excess reducing power  
284 from the chloroplast to the mitochondria by converting oxaloacetate to malate. In this process  
285 excess NADPH are used and NADP pool is regenerated (Scheibe, 2004).

286 Lipids and starch are major forms of stored energy in green algae. Fructose bis-phosphate  
287 aldolase, involved in gluconeogenesis and feeding into starch synthesis, as well as glucose-1-  
288 phosphate adenylyltransferase and starch synthase 1 (the last enzyme in starch synthesis  
289 pathway) were upregulated in UWO241-HS (Fig. 7B; Supplemental Table S2). In addition, the  
290 enzyme glycerol-3-phosphate dehydrogenase (G3PDH), involved in glycerol biosynthesis, was  
291 the highest upregulated enzyme in UWO241-HS cultures (6-fold) (Fig. 7B; Supplemental Table  
292 S2). G3PDH is involved in conversion of DHAP to sn-glycerol-3-phosphate that leads to  
293 glycerol production through glycerol kinase (GK) or G3P phosphatase (GPP) (Driver et al.,  
294 2017). The G3P produced in this reaction is also a precursor for TAG synthesis and can also lead  
295 to increased lipid production under salinity stress (Herrera-Valencia et al., 2012). On the other  
296 hand, Alcohol-aldehyde dehydrogenase (AADH) was significantly downregulated in UWO241-  
297 HS (5-fold; Fig. 7B; Supplemental Table S3).

298 Secondary metabolic pathways act as large energy sinks and help organisms deal with  
299 stress by producing useful secondary metabolites (Darko et al., 2014). Two key enzymes from  
300 the Shikimate pathway were significantly upregulated under high salinity in UWO241: (i) the  
301 first enzyme in the pathway, DAHP (3-Deoxy-D-arabinoheptulosonate 7-phosphate) synthase  
302 (2.3-fold), and (ii) the last enzyme in the pathway, chorismate synthase (1.9-fold) (Fig. 7B;

303 Supplemental Table S2). Chorismate, the product of the Shikimate pathway, is a substrate for  
304 both aromatic amino acids and many phenylpropanoid secondary metabolites. We found that  
305 indole-3-glycerol phosphate synthase (IGP synthase) was upregulated significantly in the HS  
306 conditions. IGP synthase is a branching enzyme that can either enter tryptophan pathway or lead  
307 to *de novo* biosynthesis of the plant phytohormone indole acetic acid (IAA) (Ouyang et al.,  
308 2000).

309

### 310 **Primary metabolome analysis.**

311 Comparing the whole cell proteome of LS and HS grown cultures suggested that salinity has a  
312 strong effect on primary and secondary metabolism in UWO241. To further explore this,  
313 UWO241 metabolic extracts from LS and HS cultures were analyzed using GC-MS. We detected  
314 a total of 771 unique metabolic signatures, 179 of which were positively identified based on their  
315 mass spectra and retention times according to the FiehnLab mass spectral database (Kind et al.,  
316 2009). PCA analysis of all unique metabolites demonstrates that the metabolic status of  
317 UWO241 cells grown under HS conditions is significantly different from that grown under LS  
318 along PC1, which accounts for most of the variability between samples (53.8%) (Supplemental  
319 Fig. S7). Overall, 186 out of 771 metabolites (24%) were identified as being significantly  
320 different among the two growth conditions (t-test;  $p < 0.01$ ). A heat map of all measured  
321 (identified and unidentified) metabolites showing the relative changes in primary metabolite  
322 abundances indicated clustering and a discrete population of metabolites that accumulate at high  
323 levels in HS-grown cultures when compared to LS-grown cells (Fig. 8). To better understand the  
324 effect of high salinity on the metabolic profile of UWO241, we performed a detailed analysis on  
325 the subset of primary metabolites that were positively identified. Overall, 59 metabolites (32%)

326 from different chemical categories were significantly different ( $p < 0.01$ ), out of which 9 were  
327 present in higher abundance (Supplemental Table S4) and 50 were present in lower abundance  
328 (Supplemental Table S5) in HS-grown UWO241 cultures.

329

330 Metabolites that accumulate in high amounts in HS grown cultures: We observed high levels of  
331 glycerol in the primary metabolome of HS-grown UWO241 (8.7 FC), and high accumulation of  
332 the compatible solutes, sucrose (18.2 FC) and proline (27.1 FC) (Supplemental Table S4). We  
333 also observed a high accumulation of phytol (12.6 FC), suggesting chlorophyll degradation.  
334 Tocopherol was also detected in our HS experiment in high amounts (9.5 FC), however its  
335 accumulation was variable and thus not statistically different between samples ( $p > 0.05$ ).

336

337 Metabolites that accumulate in lower amounts in HS grown cultures: UWO241 cultures grown in  
338 high salinity exhibited decreased amounts of 17 amino acids and compounds associated with  
339 amino acid metabolism (Supplemental Table S5). Most notable metabolites from this class were  
340 lysine (29.4 FC) and ornithine (14.0 FC), which could signify a shift in amino acid metabolism  
341 to proline during exposure to high salinities. We also observed lower levels of the amino acid  
342 tryptophan (2.8 FC) in HS grown cultures. Metabolites involved in purine and pyrimidine  
343 metabolism were present in lower amounts in UWO241 exposed to high salinity, suggesting that  
344 these cells have shifted their metabolism from maintenance of the cell cycle and nucleic acid  
345 synthesis to producing osmoprotectants and compatible solutes. We also observed a reduction of  
346 3-phosphoglycerate (3-PGA; 2.9 FC) in HS-grown cultures.

347

348 **DISCUSSION**



349 Our study shows that UWO241 maintains robust growth and photosynthesis under the combined  
350 stress of low temperature and high salt. This ability differs markedly from other model plants and  
351 algae that typically display downregulation of photosynthesis and growth when exposed to  
352 environmental stress, mainly as a consequence of bottlenecks in carbon fixation capacity (Hüner  
353 et al., 1998; Hüner et al., 2003; Ensminger et al., 2006; Hüner et al., 2016). Previous research has  
354 thoroughly described adaptive strategies for survival under permanent low temperatures, while  
355 survival under hypersalinity has received less consideration (Morgan et al., 1998; Morgan-Kiss  
356 et al., 2002a; Szyszka et al., 2007; Possmayer et al., 2011).

357 One of the more distinct photosynthetic characteristics of UWO241 is the presence of a  
358 strong capacity for PSI-driven CEF (Morgan-Kiss et al., 2002b; Szyszka-Mroz et al., 2015; Cook  
359 et al., 2019). We validated that CEF rates are high in HS-grown cultures using the ECS signal,  
360 which was purported to mitigate problems with using P700 absorbance changes for CEF  
361 estimates (Lucker and Kramer, 2013). While CEF appears to be essential in plants and algae for  
362 balancing the ATP/NADPH ratio and protecting both PSI and PSII from photo-oxidative damage  
363 (Munekage et al., 2004; Joliot and Johnson, 2011; Huang et al., 2012), most studies report that  
364 CEF is part of short-term stress acclimation. Our work here as well as others suggests a larger  
365 role for CEF during long-term adaptation under permanent environmental stress (Morgan-Kiss et  
366 al., 2002b; Szyszka-Mroz et al., 2015; Cook et al., 2019a).

367 Constitutively high rates of CEF in UWO241 are associated with a general reorganization  
368 of PSI and PSII complexes (Szyszka-Mroz et al., 2019) and the formation of a Cyt bf-PSI  
369 supercomplex (Szyszka-Mroz et al., 2015). In this current study, following optimization of  
370 thylakoid protein complex solubilization by substituting  $\beta$ -DDM with  $\alpha$ -DDM, the vast majority  
371 of PSI shifts from free PSI in the LS-grown cultures to association with the UWO241-SC in the

372 HS-grown cultures. PSI supercomplexes have been described in several plant and algal species  
373 (Iwai et al., 2010; Li et al., 2018; Steinbeck et al., 2018). The UWO241-SC is distinct from that  
374 of *C. reinhardtii* because: i) its assembly is independent of short-term exposure to dark anaerobic  
375 conditions or other state transition-inducing treatments (Fig. 3), ii) the vast majority of PSI in  
376 UWO241 is associated with the UWO241-SC (Fig. 3), and iii) isolated UWO241-SC and PSI  
377 bands as well as whole cells lack typical PSI fluorescence emission at 77K, despite the presence  
378 of several PSI core proteins (Fig. 4; Table 1; Supplemental Table S1; Morgan et al., 1998;  
379 Morgan-Kiss et al., 2002a, b; Cook et al., 2019). Thus, CEF combined with significant structural  
380 and functional changes to PSI are major targets for long-term stress acclimation in UWO241  
381 (Fig. 9A).

382         While the UWO241-SC contains most of the PSI core proteins, both the UWO241-SC  
383 and PSI bands, as well as whole cell proteomes isolated from LS and HS conditions lacked  
384 homologues for most LHCI proteins (Table 1; Supplemental Table S1). This agrees with an  
385 earlier study which was unable to detect most of the LHCI polypeptides by immunoblotting in  
386 UWO241 thylakoids (Morgan et al., 1998). Cook et al. (2019) also reported that the absence of  
387 LHCI proteins in UWO241 was not associated with adaptation to chronic iron deficiency, an  
388 additional stress experienced by natural communities of this alga. Transcriptomic analyses  
389 detected nine Lhca homologues in UWO241 grown under low temperature/high salinity  
390 (Supplemental Fig. S4). Therefore, it appears that while most of the Lhca genes are encoded for  
391 and transcribed, few of the LHCI proteins are produced under the growth conditions tested thus  
392 far. These results fit well with numerous unsuccessful attempts to elicit typical 77K PSI long  
393 wavelength fluorescence emission in UWO241 (Morgan et al., 1998; Morgan-Kiss et al., 2002a;  
394 Morgan-Kiss et al., 2002b; 2005; Szyszka et al., 2007; Cook et al., 2019). It also explains the

395 differences in the 77K emission spectra of the UWO241-SC and PSI bands between UWO241  
396 and *C. reinhardtii* (Fig. 4). Last, a recent study reported that UWO241 transfers light energy  
397 from PSII to PSI via constitutive energy spillover through an undescribed mechanism (Szyska-  
398 Mroz et al., 2019). Thus, UWO241 favors downregulated LHCI and constitutive energy spill-  
399 over in response to its extreme habitat, most likely the natural light environment of extreme  
400 shade enriched in blue wavelengths (Neale and Prisco, 1995).

401         The direct product of CEF is extra transthylakoid proton motive force at the expense of  
402 NADPH production (Lucker and Kramer, 2013; Dumas et al., 2016; Yamori et al., 2016a), with  
403 the consequences of CEF impacting either cellular energy production or photoprotection. CEF-  
404 dependent formation of  $\Delta pH$  protects PSII by activating the energy-dependent quenching (qE), a  
405 major process for dissipation of excess light energy in PSII (Yamori et al., 2016). Alternatively,  
406 CEF-generated pmf can be used for production of additional ATP for high-energy consuming  
407 processes including protein synthesis, transport processes, ion homeostasis (He et al., 2015), CO<sub>2</sub>  
408 concentrating mechanisms (Horváth et al., 2000; Lucker and Kramer, 2013), or production of  
409 secondary metabolites (Murthy et al., 2014). Last, CEF prevents PSI photoinhibition by  
410 downregulating LEF and alleviating over-reduction of the acceptor side of PSI, thereby  
411 preventing ROS-induced PSI damage (Munekage et al., 2008; Shimakawa et al., 2016; Chaux et  
412 al., 2017; Huang et al., 2017). A strong constitutive CEF mechanism in UWO241 could be  
413 beneficial for one or most of the above purposes. First, HS-grown cultures possess a higher  
414 capacity for NPQ (Supplemental Fig. S2), supporting a role for CEF in constitutive  
415 photoprotection ability. Expression of a thylakoid BEST ion channel also suggests CEF may be  
416 used for NPQ. High CEF rates also correlate with a higher Y(PSI) and a lower PSI acceptor side

417 limitation in HS-grown cultures (Supplemental Fig. S3), suggesting enhanced PSI  
418 photoprotection in UWO241-HS cells.

419 ATP synthase subunits were associated with the UWO241-SC (Table 1), suggesting CEF  
420 contributes extra ATP in UWO241. HS-grown cultures exhibited significantly higher  $ECS_t$  and  
421  $v_{H^+}$  compared to LS-grown cultures, suggesting a high flux of protons through the chloroplastic  
422 ATP synthase in spite of slow activity of ATP synthase (compare Fig. 2A and C with Fig. 2B).  
423 Slower activity of ATP synthase could be overcome by higher ATP synthase subunits in the HS-  
424 grown UWO241 which is reported here (Figs. 6 and 7) and in an earlier report (Morgan et al.,  
425 1998). Recently it was shown that in a salt-tolerant soybean, increased CEF contributes to excess  
426 ATP that is used to drive import of  $Na^+$  in the vacuole (He et al., 2015). Taken together,  
427 constitutively high rates of CEF in UWO241 are likely to provide dual benefits, that of  
428 constitutive photoprotection of both PSI and PSII and extra ATP to support downstream  
429 processes important for low temperature and/or high salinity adaptation (Fig. 9A).

430 Comparison of whole cell proteomes and metabolomes revealed significant shifts in  
431 primary and secondary metabolism in LS- and HS-grown UWO241. First, HS-grown cultures  
432 have a strong carbon fixation potential. Key enzymes within the CBB cycle are upregulated  
433 under HS, including large subunit of RubisCO (LSU, EC 4.1.39) and a chaperone complex  
434 involved in RubisCO assembly (RuBA and RuBB proteins). Several enzymes important in  
435 regeneration of ribulose-1,5-bisphosphate (RuBP), including fructose-1,6-bisphosphatase  
436 (FBPase, EC 3.1.3.11), fructose-bisphosphate aldolase (EC 4.1.2.13), transketolase (EC 2.2.1.1),  
437 ribose-5 phosphate isomerase (EC 5.2.1.6), and phosphoribulokinase (PRK, EC 2.7.1.19), are  
438 also higher in HS-grown cells (Fig. 9B). Overexpression of key bottleneck CBB enzymes such as  
439 FBPase and SBPase enhances carbon fixation and RuBP regeneration (Lefebvre et al., 2005;

440 Tamoi et al., 2006), while also supporting improved photosynthesis during stress (Driever et al.,  
441 2017). Low levels of 3-PGA, the direct biproduct of RubisCO activity also suggests strong  
442 carbon sinks for fixed CO<sub>2</sub> in HS-grown cultures (Supplemental Table S5). Last, overproduction  
443 of these key CBB enzymes is supported by a robust protein translation ability, as several  
444 ribosomal proteins are also overexpressed in HS-grown cells (Supplemental Table S2).

445       Enhanced CBB pathway activity would support robust photosynthetic activity and growth  
446 in UWO241. However, proteomic evidence revealed other potential carbon sinks, including  
447 carbon storage in the form of starch (Supplemental Table S2). Two key enzymes of starch  
448 synthesis were upregulated under high salinity, G1P adenylyltransferase (AGPase; EC 2.7.7.27)  
449 and starch synthase (EC 2.4.1.242). AGPase catalyzes the formation of glucose-1-phosphate to  
450 ADP-glucose and consumes 1 ATP. ADP-glucose serves as substrate for starch synthase to  
451 extend the glucosyl chain in starch. In contrast with these findings, plant and algal fitness and  
452 survival under low temperatures or high salinity is associated with starch degradation (reviewed  
453 in Thalmann et al., 2016). Under abiotic stress starch is remobilized into sugars and other  
454 metabolites to provide carbon and energy when photosynthesis is compromised. In contrast with  
455 cold- or salt-sensitive plants and algae, the photosynthetic apparatus of UWO241 is remodeled to  
456 support photosynthesis under continuous low temperatures and high salinity (Morgan et al.,  
457 1998; Szyszka et al., 2007; Pocock et al., 2011). Thus, accumulation of starch in UWO241 may  
458 act as a strong carbon sink to support high rates of carbon fixation (Fig. 9B). Starch stored in the  
459 chloroplast is also transitory, and is often rapidly turned over (Thalmann et al., 2016). Starch  
460 content was comparable between LS- and HS-grown UWO241 cultures (Supplemental Fig. S6).  
461 Thus, transiently stored starch could be an additional adaptive strategy in UWO241, acting as an  
462 energy and carbon buffer which can be rapidly mobilized when needed. This theory is supported

463 by other publications that reported accumulation of starch under cold or salinity stress (Siaut et  
464 al., 2011; Wang et al., 2013), suggesting that transitory starch synthesis and mobilization may be  
465 important during stress acclimation.

466 Glycerol is a compatible solute that accumulates at molar levels in the salt-tolerant alga  
467 *Dunaliella* (Avron, 1986; Brown, 1990; Goyal, 2007a,b). Glycerol is synthesized through two  
468 independent pathways localized in the chloroplast and the cytosol. In the presence of light, the  
469 chloroplast pathway dominates at the expense of starch synthesis (Gimmler and Möller, 1981),  
470 while in the dark, stored starch is degraded to provide substrates for the cytosolic pathway (Ben-  
471 Amotz and Avron, 1973). Under high salinity stress, *D. tertiolecta* utilizes both the chloroplast  
472 and cytosolic pathways for glycerol synthesis (Goyal, 2007a, b). Overexpression of *D. bardawil*  
473 SBPase in *C. reinhardtii* led to increased accumulation of glycerol and improved photosynthesis  
474 under salinity stress (Fang et al., 2012). This current study showed that UWO241 also  
475 accumulates glycerol in response to increased salinity (Supplemental Table S4). Synthesis of  
476 glycerol could occur through either the chloroplast or cytosolic pathway, since isoforms of both  
477 the cytosolic and chloroplast glycerol-3 phosphate dehydrogenases (GPDH, EC 1.1.1.8) were  
478 upregulated under high salinity (Supplemental Table S2). GPDH is responsible for the first step  
479 in glycerol synthesis, conversion of dihydroxyacetone phosphate (DHAP) to glycerol 3-  
480 phosphate (G3P), and also supplies G3P for chloroplastic glycerolipid synthesis (Chandra-  
481 Shekara et al., 2007). The cytosolic GPDH is highly overexpressed in UWO241, suggesting that  
482 glycerol production via starch breakdown may be the dominant pathway in this organism.

483 The shikimate pathway is an essential link between primary and secondary metabolism  
484 for producing precursors for aromatic amino acids (tryptophan, phenylalanine, tyrosine) as well  
485 as many other aromatic metabolites such as, indole compounds, alkaloids, lignin and flavonoids

486 (Maeda and Dudareva, 2012). It is a high carbon flux pathway, accounting for approx. 30% of all  
487 fixed CO<sub>2</sub> in an organism (Tohge et al., 2013). Various biotic and abiotic stresses upregulate  
488 genes of the Shikimate pathway as well as downstream biosynthesis pathways which use the  
489 main product of the Shikimate pathway, chorismate, as a substrate (Tzin and Galili, 2010).  
490 Chorismate is an important substrate for production of a number of molecules important for plant  
491 defense, including salicylic acid and auxins (Berens et al., 2017). HS-grown UWO241 exhibited  
492 upregulation of two key Shikimate enzymes, 3-deoxy-D-arabino-heptulosonate 7-phosphate  
493 synthase (DHAP synthase; EC 2.5.1.54) and chorismate synthase (EC 4.2.3.5), catalyzing the  
494 first and last enzymatic reactions, respectively (Fig. 9B; Supplemental Table S2). The substrates  
495 for DAHP synthase are erythrose-4-phosphate (E4P) and PEP. E4P is a product of the CBB cycle  
496 enzyme transketolase. Upregulation of transketolase in HS-grown cells indicates that E4P would  
497 be supplied in high levels to support high flux through the Shikimate pathway. On the other  
498 hand, supply of PEP for chorismate synthesis is likely to come from glycolysis, as indicated by  
499 the higher level expression of G3P dehydrogenase under the HS condition (Supplemental Table  
500 S2). Thus, the CBB cycle and glycolysis are likely to be coordinated in order to provide  
501 substrates to support high flux through the shikimate pathway. Last, there is evidence linking  
502 CEF with the Shikimate pathway. One recent study involving a CEF mutant of *Arabidopsis*  
503 *thaliana* (lacking pgr5 protein) showed that the levels of Shikimate metabolites were  
504 significantly reduced in the CEF mutant as compared to wild type, suggesting a link between  
505 CEF and chorismate synthesis (Florez-Sarasa et al., 2016).

506         Acclimation to a variety of stresses in plants and algae often involves upregulation of  
507 heat shock proteins, stress metabolites, as well as signaling molecules such as plant hormones  
508 and signal transduction pathways (eg: Ca<sup>2+</sup>) (Montero-Barrientos et al., 2010; Suzuki et al.,

509 2016). Several stress metabolites utilize chorismate as a substrate; although, many of these are  
510 typically associated with plant hormone production. We provide evidence in the proteome of  
511 UWO241 that a biosynthetic enzyme of the tryptophan pathway, indole-3-glycerol phosphate  
512 synthase (IGPS, EC 4.1.1.48) is highly expressed under high salt (Supplemental Table S2). This  
513 enzyme is the fourth step in the biosynthesis pathway of L-tryptophan (L-Trp) from chorismite  
514 (Fig. 9B). Therefore, it is possible that a product of the shikimate pathway in HS grown  
515 UWO241 is the aromatic amino acid L-Trp. However, the metabolome data showed that L-Trp  
516 levels were reduced in the HS-grown cultures (Supplemental Table S5). L-Trp is also a major  
517 substrate for production of the phytohormone, indole-3 acetic acid (IAA), and the product of  
518 IGPS, indol-3-glycerol phosphate, is a branch point between L-Trp synthesis and a L-Trp  
519 independent IAA synthesis pathway (Ouyang et al., 2000). IAA and several other  
520 phytohormones have been detected in a few cyanobacteria and algal species; however, their  
521 putative function is largely based on exogenously added plant phytohormones to algal cultures  
522 (Lu and Xu, 2015). Exogenously added IAA stimulates carbon fixation and growth and enhances  
523 stress tolerance in algae (Lu and Xu, 2015). Last, IAA production increases  $Ca^{2+}$  levels in plants  
524 during acclimation to abiotic stress (Vanneste and Friml, 2013).  $Ca^{2+}$  signaling has been linked  
525 to both CEF and assembly of PSI supercomplexes (Terashima et al., 2012). Indeed, the Calcium  
526 sensing receptor (CAS) was an abundant protein associated with the UWO241-SC (Table 1).  
527 More work will be needed to ascertain whether IAA and  $Ca^{2+}$  play roles in CEF and assembly of  
528 the UWO241-SC.

529         Despite more than 2 decades of study, the enigmatic UWO241 still has secrets to share.  
530 Recent papers have added to the breadth of knowledge on the photosynthetic apparatus,  
531 including a cold-adapted ferredoxin isoform (Cvetkovska et al., 2018) and a thylakoid kinase



532 exhibiting temperature-dependent phosphorylation patterns (Szyska-Mroz et al., 2019). Here we  
533 extend our understanding of long-term photosynthetic adaptation to permanent cold and  
534 hypersalinity by proposing a model for sustained PSI-CEF that supports a robust CBB pathway  
535 and a regular growth rate (Fig. 9). Under permanent environmental stress, CEF supplies  
536 constitutive photoprotection of PSI and PSII while also producing extra ATP for downstream  
537 metabolism (Fig. 9A). The restructured photosynthetic apparatus is accompanied by major  
538 rewiring of central metabolism to provide a strong carbon fixation potential which is used in part  
539 to produce stored carbon and secondary metabolites (Fig. 9B). Algae adapted to multiple  
540 stressors such as low temperatures combined with high salinity are robust fixers of CO<sub>2</sub>,  
541 providing new genetic targets for improving crop stress resistance and previously unconsidered  
542 sources of natural carbon sinks.

543

## 544 **MATERIALS AND METHODS**

### 545 **Culture conditions, growth physiology.**

546 *Chlamydomonas* sp. UWO241 (UWO241; CCMP1619) was grown in either Bold's Basal Media  
547 (BBM, 0.43 mM NaCl) or BBM supplemented with 700 mM NaCl. Based on earlier studies  
548 (Morgan et al. 1998), UWO241 cultures were grown under a temperature/irradiance regime of  
549 8°C/50 photons  $\mu\text{mol m}^{-2}\text{s}^{-1}$ . *C.reinhardtii* UTEX 90 was grown in BBM at 20°C and 100  $\mu\text{mol}$   
550 photons  $\text{m}^{-2}\text{s}^{-1}$ . All cultures were grown in 250 ml glass pyrex tubes in temperature regulated  
551 aquaria under a 24 hour light cycle and were continuously aerated with sterile air supplied by  
552 aquarium pumps (Morgan-Kiss et al., 2008). Growth was monitored daily by optical density at  
553 wavelength of 750 nm. Maximum growth rates were calculated using natural log transformation

554 of the optical density values during the exponential phase. Three biological replicates were  
555 performed and all subsequent experiments were conducted on log-phase cultures.

556 Oxygen evolution was measured at 8 °C with Chlorolab 2 (Hansatech, UK) based on a  
557 Clark-type oxygen electrode, following the method described in Jeong et al. (2017) with some  
558 modifications. A 2 mL of cell supplemented with 20 µL of 0.5 M NaHCO<sub>3</sub> was incubated in the  
559 dark for 10 min to drain electrons from electron transport chain. The rate of oxygen exchange  
560 was measured at increasing light intensities (50, 100, 200, 400 and 600 µmol photons m<sup>-2</sup> s<sup>-1</sup>).  
561 Each light lasted 5min and the rates of oxygen evolution at each light intensity step were  
562 recorded for 1 min before the end of each light phase. Each light was followed by 2min dark to  
563 get the respiration rates.

564

#### 565 **Low temperature (77K) fluorescence spectra.**

566 Low temperature Chl a fluorescence emission spectra of whole cells and isolated Chl-protein  
567 complexes were measured using Luminescence Spectrometer LS50B (Perkin Elmer, USA) as  
568 described in Morgan et al. (2008) at 436 nm and 5 (isolate complexes) or 8 nm (whole cells) slit  
569 widths. Prior to the measurement, cultures were dark adapted for 10 mins. Decompositional  
570 analysis was performed using a non-linear least squares algorithm using Microcal OriginPro  
571 Version 8.5.1 (Microcal Origin Northampton, MA). The fitting parameters for the Gaussian  
572 components (position, area and full width half-maximum, FWHM) were free running  
573 parameters.

574

#### 575 **P700 oxidation-reduction and cyclic electron flow.**

576 Far red light induced photooxidation of P700 was used to determine rates of CEF as described by  
577 Morgan-Kiss et al. (2002b). A volume of exponential phase cultures representing 25  $\mu\text{g}$  Chl a  
578 was dark adapted for 10 min and then filtered onto 25 mm GF/C filters (Whatman). Filters were  
579 measured on the Dual-PAM 100 instrument using the leaf attachment. The proportion of  
580 photooxidizable P700 was determined by monitoring absorbance changes at 820 nm and  
581 expressed as the parameter ( $\Delta A_{820}/A_{820}$ ). The signal was balanced and the measuring light  
582 switched on. Far red (FR) light ( $\lambda_{\text{max}}=715$  nm,  $10 \text{ Wm}^{-2}$ , Scott filter RG 715) was then  
583 switched on to oxidize P700. After steady-state oxidation levels were reached, the FR light was  
584 switched off to re-reduce P700. The half time for the reduction of P700<sup>+</sup> to P700 ( $t_{1/2}^{\text{red}}$ ) was  
585 calculated after the FR light was turned off as an estimate of relative rates of PSI-driven CEF  
586 (Ivanov et al., 1998). The re-reduction time for P700 was calculated using Microcal™ Origin™  
587 software (Microcal Software Inc., Northampton, MA, USA).

588

### 589 **In vivo spectroscopy measurements.**

590 Saturation-pulse chlorophyll fluorescence yield changes and dark interval relaxation kinetics  
591 (DIRK) of ECS were measured at 8 °C with the IDEA spectrophotometer as described  
592 previously with some modifications (Sacksteder and Kramer, 2000; Zhang et al., 2009). A 2.5  
593 mL of cell supplemented with 25  $\mu\text{L}$  of 0.5 M  $\text{NaHCO}_3$  was pre-incubated in the dark for 10 min  
594 and followed by 10 min illumination of far-red light. The chlorophyll fluorescence and ECS  
595 were measured with the cells acclimated for 5 min in various actinic light intensities provided by  
596 red LEDs. The PSII operating efficiency ( $\Phi_{\text{PSII}}$ ) was calculated as  $F_q'/F_m'$ , NPQ as  $(F_m - F_m')/F_m'$ .  
597 The linear electron transport (LEF) was calculated from following equation:  $\text{LEF} = A \times$   
598  $(\text{fraction}_{\text{PSII}}) \times I \times \Phi_{\text{PSII}}$ , where  $I$  is the light intensity,  $A$  is the absorptivity of the sample, which

599 is generally assumed to be 0.84 and  $fraction_{PSII}$  is the fraction of absorbed light stimulating PSII  
600 (Baker, 2008). The  $fraction_{PSII}$  of UWO241 grown in low-salt and high salt, measured by 77K  
601 fluorescence spectra, were 0.709 and 0.746, respectively. The total amplitude of the ECS signal  
602 ( $ECS_t$ ) was used to estimate the proton motive force ( $pmf$ ). The aggregate conductivity of the  
603 thylakoid membrane to protons ( $g_{H^+}$ ) was estimated from the inverse of lifetime of the rapid  
604 decay of ECS ( $\tau_{ECS}$ ) (Baker et al., 2007). All ECS signals were normalized to the rapid rise in  
605 ECS induced by a single turnover flash to account for changes in pigmentation (Livingston et al.  
606 2010).

607

#### 608 **Thylakoid isolation.**

609 Thylakoids were isolated according to Morgan-Kiss et al. (1998). Mid-log phase cultures were  
610 collected by centrifugation at 2500g for 5 min at 4°C. All buffers were kept ice-cold and  
611 contained 1 mM Pefabloc Sc (Sigma, USA) and 20 mM NaF. The pellet was resuspended in  
612 grinding buffer (0.3 M sorbitol, 10 mM NaCl, 5 mM MgCl<sub>2</sub>, 5 mM MgCl<sub>2</sub>, 1 mM benzamidine,  
613 1mM amino-caproic acid). The cells were disrupted using chilled French press at 10,000 lb/in<sup>2</sup>  
614 twice, and then and centrifuged at 23,700g for 30 min. The thylakoid pellet was resuspended in  
615 wash buffer (50 mM Tricine-NaOH [pH 7.8], 10 mM NaCl, 5 mM MgCl<sub>2</sub>) and centrifuged at  
616 13,300xg for 20 min. The pellet was resuspended in storage buffer (0.3 M sorbitol, 10% glycerol,  
617 50 mM Tricine-NaOH [pH 7.8], 10 mM NaCl and 5 mM MgCl<sub>2</sub>) and stored at -80°C until  
618 analysis.

619

#### 620 **SDS-PAGE and Immunoblotting.**

621 SDS-PAGE was performed using Bio-Rad Mini-Protean system and 12% Urea-SDS gel  
622 (Laemmli, 1970). Thylakoid membranes were denatured using 50 mM DTT and incubated at  
623 70°C for 5 min. Samples were loaded on equal protein basis (10 µg total protein). Proteins were  
624 transferred to nitrocellulose membrane using cold-wet transfer at 100 V for 2.5 hours. The  
625 membrane was blocked with TBST (Tris Buffer Saline Tween) buffer with 5% milk (Carnation).  
626 A primary antibody against PsaA (Cat No. AS06-172; Agrisera, Sweden) was used at 1:1000  
627 dilution to probe for major reaction center protein of PSI. Membranes were then exposed to  
628 Protein A conjugated to horseradish peroxidase and blots were detected with ECL Select™  
629 Western Blotting Detection Reagent (Amersham).

630

### 631 **Supercomplex isolation.**

632 Sucrose step density centrifugation was used to isolate supercomplexes from exponentially  
633 grown cultures according to Szyszka-Mroz et al. (2015) with some modifications. Every step  
634 was performed in darkness and on ice. All buffers contained phosphatase (20 mM NaF) and  
635 protease (1 mM Pefabloc SC) inhibitor. Cells were collected by centrifugation and the pellet was  
636 washed twice in Buffer 1 (0.3 M Sucrose, 25 mM HEPES-KOH [pH 7.5], 1mM MgCl<sub>2</sub>). Cells  
637 were disrupted using French press, as described above and broken cells were spun down at  
638 50,000g for 30 min. The pellet was resuspended in Buffer 2 (0.3 M Sucrose, 5 mM HEPES-KOH  
639 [pH 7.5], 10 mM EDTA) and centrifuged at 50,000g for 30 min. The thylakoid pellet was  
640 resuspended gently in Buffer 3 (1.8 M Sucrose, 5mM HEPES-KOH [pH 7.5], 10 mM EDTA) and  
641 transferred to Ultra-clear tube (Catalogue No., 344060, Beckman Coulter, USA). The thylakoid  
642 prep was overlaid with Buffer 4 (1.3 M Sucrose, 5mM HEPES-KOH [pH 7.5], 10 mM EDTA)  
643 followed by Buffer 5 (0.5 M Sucrose, 5mM HEPES-KOH [pH 7.5]). This sucrose step gradient

644 was ultra-centrifuged at 288,000g for 1 hour at 4°C using Sw40Ti rotor (Beckman coulter,  
645 USA). Purified thylakoids were collected and diluted (3-fold) in Buffer 6 (5 mM Hepes-KOH  
646 [pH 7.5], 10 mM EDTA) and centrifuged at 50,000xg to pellet the membrane. Linear sucrose  
647 gradients were made using freeze thaw method with Buffer 7a (1.3 M Sucrose, 5 mM Hepes-  
648 KOH [pH 7.5], 0.05%  $\alpha$ -DDM) and Buffer 7b (0.1 M Sucrose, 5 mM Hepes-KOH [pH 7.5],  
649 0.05%  $\alpha$ -DDM). Briefly, two dilutions of Buffers 7a and 7b were made, Buffer 7-1 (2x Buffer 7a  
650 + 1x Buffer 7b) and Buffer 7-2 (1x Buffer 7 a + 2x Buffer 7b). To make the gradient, first 3 ml  
651 of Buffer 7a was poured into 12 ml ultra clear tubes followed by flash freezing in liquid nitrogen.  
652 Next, Buffer 7-1 was poured on top, followed by flash freezing. This was repeated for Buffer 7-2  
653 and Buffer 7b respectively. The frozen gradients were kept at 4°C overnight to thaw. For  
654 supercomplex isolation, thylakoid membranes (0.4 mg Chl) were resuspended in 1% n-dodecyl-  
655 alpha-maltoside ( $\alpha$ -DDM) (Catalogue number D99020, Glycon Biochemicals, Germany) and  
656 incubated on ice in the dark for 25 min. Membranes were spun down to remove insoluble  
657 material and loaded onto a linear sucrose gradient described above(0.1 – 1.3 M sucrose)  
658 containing 0.05%  $\alpha$ -DDM. Gradients were centrifuged at 288,000g for 21 hours at 4°C using  
659 SW40Ti rotor (Beckman Coulter, USA). Protein complexes were extracted using a 21-gauge  
660 needle.

661

### 662 **Sample preparation for proteomics.**

663 Whole cell proteins were extracted as described previously (Valledor and Weckwerth, 2014).  
664 Mid-log phase cells were collected by centrifugation at 2500g for 5 min (50 mg wet weight). The  
665 cell pellets were resuspended in an extraction buffer containing 100 mM Tris-HCl (pH 8.0), 10%  
666 (v/v) glycerol, 2 mM Pefabloc Sc, 10 mM DTT, and 1.2 % (v/v) plant protease inhibitor cocktail

667 (Cat. No. P9599, Sigma). Samples were transferred to 2 mL screw cap tubes containing 25 mg of  
668 zirconia beads (Cat. No. A6758, Biorad) and homogenized 3 times for 45 seconds in a  
669 BeadBeater (BioSpec). 20% SDS solution was added to the tubes and samples were incubated  
670 for 5 min at 95°C. The denatured proteins were centrifuged at 12,000g to pellet any insoluble  
671 material. Protein pellets were resuspended in 1.5 ml tris buffer (50mM Tris-HCl, pH 8.0)  
672 containing 0.02% n-dodecyl-beta-maltoside (Glycon Biochemicals, Germany) and supplemented  
673 with 1X Halt™ protease and phosphatase inhibitor cocktail (Thermo-Scientific, Rockford, IL).  
674 After the protein extraction, the sample preparation for proteomics were conducted following our  
675 previously published method (Wang et al., 2016). Specifically, 100 µg of total protein were  
676 treated with 8 M Urea/5 mM DTT for 1 hour at 37°C, followed by alkylation with 15 mM  
677 iodoacetamide in dark for 30 minutes at room temperature. Samples were then diluted four folds  
678 with 50 mM Tris-HCl buffer and digested using Mass-spectrometry Grade Trypsin Gold  
679 (Promega, Madison, WI) at 1:100 w/w concentration for 16.5 hours at 37°C. The digested  
680 samples were cleaned using Sep-Pak C18 plus desalting columns (Waters Corporation, Milford,  
681 MA).

682

### 683 **Proteomic analyses by liquid chromatography-tandem mass spectrometry (LC-MS/MS).**

684 The whole cell proteomics were conducted using the Multidimensional Protein Identification  
685 Technology (MudPIT) based shotgun proteomics by loading digested peptides onto a biphasic  
686 strong cation exchange/reversed phase capillary column. The two dimensional (2D)-LC-MS/MS  
687 was conducted on an LTQ ion trap mass spectrometer (Thermo Finnegan, San Jose, CA)  
688 operated in the data-dependent acquisition mode. The full mass spectra were recorded at 300-  
689 1700 m/z, and the 5 most abundant peaks of each scan were selected for MS/MS analysis. The

690 MS/MS raw data was analyzed by first converting into MS2 files, followed by database search  
691 using ProLuCID (Xu et al., 2006). The UWO241 protein database was generated based on our  
692 transcriptomics data supplemented with 37 common contaminants, and their reversed sequences  
693 as quality control system to restrain false positive discovery to 0.05. Differentially expressed  
694 proteins were analyzed using PatternLab for Proteomics (Carvalho et al., 2008). The proteomics  
695 results have been deposited to the MassIVE repository with the identifier MSV000084382.

696 For identifying protein components in the supercomplex, the complex was harvested and  
697 30 µg of total protein was processed similarly as described above to get the digested peptides.  
698 Different from the whole cell proteomics, the processed the peptides were directly loaded onto a  
699 capillary C18 column without fractionation, and further analyzed in a Thermo LTQ Orbitrap XL  
700 mass spectrometer. The full mass spectra were recorded in the range of 350-1800 m/z with the  
701 resolution of 30,000. The top 12 peaks of each scan were selected for MS/MS analysis. The data  
702 analysis was conducted similarly as described above.

703

#### 704 **Identification and analysis of Lhca and BEST protein homologues.**

705 Homologues of Lhca and a bestrophin-like protein were identified from a transcriptome  
706 previously generated from UWO241 (Raymond et al., 2009; NCBI BioProject No.  
707 PRJNA575885). Plastid-targeting signal and transmembrane domains for the putative BEST  
708 protein were predicted by ChloroP analysis (<http://www.cbs.dtu.dk/services/ChloroP/>) and  
709 TMHMM software (<http://www.cbs.dtu.dk/services/TMHMM-2.0/>). The tertiary structure of the  
710 *C. sp.* UWO241 BEST protein was modeled on the high resolution crystal structure of *Klebsiella*  
711 *pneumoniae* Best complex (Yang et al., 2014) in Swiss-Model (<https://swissmodel.expasy.org/>).

712



### 713 **Gas Chromatography - Mass Spectrometry.**

714 For determination of the primary metabolome UWO241 were grown in four biological replicate  
715 cultures as described above. Algal cells were harvested by centrifugation (6,000g, 5 min, 4°C)  
716 and washed once with fresh media. The supernatant was decanted, and the algal cells were flash  
717 frozen in liquid nitrogen and stored at -80°C. The metabolite extraction protocol was adapted  
718 from (Fiehn et al., 2008). In brief, metabolites were extracted from 20 mg of frozen tissue in 1 ml  
719 cold extraction buffer (methanol: chloroform: dH<sub>2</sub>O; 5:2:2). The samples were homogenized using  
720 glass beads (500 µm i.d.) in a Geno/Grinder 2010 instrument (SpexSamplePrep, Metuchen, NJ,  
721 USA), followed by centrifugation (14,000g, 2 min, 4°C). Samples were further processed and  
722 derivatized for GC-TOF mass spectrometry as described (Lee and Fiehn, 2008). GC-MS  
723 measurements were carried out on an Agilent 6890 gas chromatograph (Agilent, Santa Clara,  
724 CA, USA), controlled by a Leco ChromaTOF software v 2.32 (Leco, St. Joseph, MI, USA).  
725 Separation was performed on a Rtx-5Sil MS column (30m x 0.25mm x 0.25µm) with an  
726 additional 10 m empty guard column (Restek, Bellefonte, PA, USA) using helium as a carrier (1  
727 ml/min flow rate). The oven temperature was held constant at 50°C for 1 min, then ramped at  
728 20°/min to 330°C at which it was held constant for 5 min. A Leco Pegasus IV mass spectrometer  
729 (Leco, St. Joseph, MI, USA) was operated in electron impact (EI) mode at -70 eV ionization  
730 energy with unit mass resolution at 17 spectra/s with a scan range of 80-500 Da. The transfer line  
731 temperature between gas chromatograph and mass spectrometer was set to 280°C. Ionization  
732 Electron impact ionization at 70V was employed with an ion source temperature of 250°C.  
733 Mass spectra were processed using BinBase, an application system for deconvoluting and  
734 annotating mass spectral data, and analyzed as described in (Fiehn et al., 2005). Metabolites were  
735 identified based on their mass spectral characteristics and GC retention times, by comparison

736 with compounds in a plant and algae reference library (West Coast Metabolomics Center, UC  
737 Davis, CA, USA). Peak heights for the quantification ion at the specific retention index  
738 corresponding to each metabolite were normalized by the sum of peak heights in the sample.  
739 Normalized data were processed by cube root transformation followed by range scaling (van den  
740 Berg et al., 2006). Statistical analyses were performed by the Metaboanalyst 4.0 software suite  
741 (Chong et al., 2018), and included principal component analysis (PCA), t-test, heatmap and  
742 clustering analysis using Ward's linkage for clustering and Pearson's correlation as a measure of  
743 dissimilarity.

744  
745 **ACKNOWLEDGEMENTS**

746 The authors thank the staff (Dr. Andor Kiss and Ms. Xiaoyun Deng) of the Center for  
747 Bioinformatics & Functional Genomics (CBFG) at Miami University for instrumentation and  
748 computational support. We also would like to thank people from the Kramer Laboratory (Drs.  
749 David Kramer, Jeffrey Cruz, Robert Zegarac, Ben Lucker) for their suggestions to setup and  
750 optimize the IDEAspec for spectroscopic measurements in UWO241. Funding was provided by  
751 NSF Grant 1637708 (RMK, IK), DOE Grant DE-SC0019138 (RMK, IK, XW), DOE grant DE-  
752 SC0019464 (JJ, WM, RZ) and Donald Danforth Plant Science Center startup fund (RZ).

753

754 **REFERENCES**

- 755 **Avron M** (1986) The osmotic components of halotolerant algae. *Tren Biochem Sci* **11**: 5-6
- 756 **Baker NR** (2008) Chlorophyll fluorescence: a probe of photosynthesis in vivo. *Ann Rev Plant*  
757 *Biol* **59**: 89-113
- 758 **Baker NR, Harbinson J, Kramer DM** (2007) Determining the limitations and regulation of  
759 photosynthetic energy transduction in leaves. *Plant, Cell & Environ* **30**: 1107-1125
- 760 **Ben-Amotz A, Avron M** (1973) The role of glycerol in the osmotic regulation of the halophilic  
761 alga *Dunaliella parva*. *Plant Physiol.* **51**: 875-878
- 762 **Berens ML, Berry HM, Mine A, Argueso CT, Tsuda K** (2017) Evolution of hormone  
763 signaling networks in plant defense. *Ann Rev Phytopathol* **55**: 401-425
- 764 **Brown A** (1990) Microbial water stress physiology. Principles and perspectives. John Wiley &  
765 Sons
- 766 **Cardol P, Forti G, Finazzi G** (2011) Regulation of electron transport in microalgae. *Biochim et*  
767 *Biophys Acta* **1807**: 912-918
- 768 **Carrillo LR, Froehlich JE, Cruz JA, Savage LJ, Kramer DM** (2016) Multi-level regulation  
769 of the chloroplast ATP synthase: the chloroplast NADPH thioredoxin reductase C  
770 (NTRC) is required for redox modulation specifically under low irradiance. *Plant J* **87**:  
771 654-663
- 772 **Carvalho PC, Fischer JS, Chen EI, Yates JR, Barbosa VC** (2008) PatternLab for proteomics:  
773 a tool for differential shotgun proteomics. *BMC Bioinform* **9**: 316
- 774 **Chandra-Shekara A, Venugopal SC, Barman SR, Kachroo A, Kachroo P** (2007) Plastidial  
775 fatty acid levels regulate resistance gene-dependent defense signaling in Arabidopsis.  
776 *Proc Natl Acad Sci USA* **104**: 7277-7282
- 777 **Chaux F, Johnson X, Auroy P, Beyly-Adriano A, Te I, Cuiné S, Peltier G** (2017) PGRL1 and  
778 LHCSR3 compensate for each other in controlling photosynthesis and avoiding  
779 photosystem I photoinhibition during high light acclimation of *Chlamydomonas* cells.  
780 *Molec Plant* **10**: 216-218
- 781 **Chong J, Soufan O, Li C, Caraus I, Li S, Bourque G, Wishart DS, Xia J** (2018)  
782 MetaboAnalyst 4.0: towards more transparent and integrative metabolomics analysis.  
783 *Nucl Acids Res* **46**: W486-W494
- 784 **Cook G, Teufel A, Kalra I, Li W, Wang X, Priscu J, Morgan-Kiss R** (2019a) The Antarctic  
785 psychrophiles *Chlamydomonas* spp. UWO241 and ICE-MDV exhibit differential  
786 restructuring of photosystem I in response to iron. *Photosynth. Res.* **141**: 209-228
- 787 **Cvetkovska M, Hüner NP, Smith DR** (2017) Chilling out: the evolution and diversification of  
788 psychrophilic algae with a focus on Chlamydomonadales. *Polar Biol.* **40**: 1169-1184
- 789 **Cvetkovska M, Szyszka - Mroz B, Possmayer M, Pittock P, Lajoie G, Smith DR, Hüner NP**  
790 (2018) Characterization of photosynthetic ferredoxin from the Antarctic alga  
791 *Chlamydomonas* sp. UWO 241 reveals novel features of cold adaptation. *New Phytol*  
792 **219**: 588-604
- 793 **DalCorso G, Pesaresi P, Masiero S, Aseeva E, Schünemann D, Finazzi G, Joliot P, Barbato**  
794 **R, Leister D** (2008) A Complex Containing PGRL1 and PGR5 Is Involved in the Switch  
795 between Linear and Cyclic Electron Flow in *Arabidopsis*. *Cell* **132**: 273-285
- 796 **Darko E, Heydarizadeh P, Schoefs B, Sabzaljian MR** (2014) Photosynthesis under artificial  
797 light: the shift in primary and secondary metabolism. *Phil Trans R Soc B* **369**: 20130243

- 798 **Dolhi JM, Maxwell D, Morgan-Kiss RM** (2013) The Antarctic *Chlamydomonas raudensis*: an  
799 emerging model for cold adaptation of photosynthesis. *Extremophiles* **17**: 711-722
- 800 **Driever SM, Simkin AJ, Alotaibi S, Fisk SJ, Madgwick PJ, Sparks CA, Jones HD, Lawson**  
801 **T, Parry MA, Raines CA** (2017) Increased SBPase activity improves photosynthesis  
802 and grain yield in wheat grown in greenhouse conditions. *Phil Trans R Soc Lond B*. **372**:  
803 20160384
- 804 **Driver T, Trivedi DK, McIntosh OA, Dean AP, Goodacre R, Pittman JK** (2017) Two  
805 glycerol-3-phosphate dehydrogenases from *Chlamydomonas* have distinct roles in lipid  
806 metabolism. *Plant Physiol*. **174**: 2083-2097
- 807 **Duan Z, Kong F, Zhang L, Li W, Zhang J, Peng L** (2016) A bestrophin - like protein  
808 modulates the proton motive force across the thylakoid membrane in *Arabidopsis*. *J Int*  
809 *Plant Biol* **58**: 848-858
- 810 **Dumas L, Chazaux M, Peltier G, Johnson X, Alric J** (2016) Cytochrome b<sub>6</sub>f function and  
811 localization, phosphorylation state of thylakoid membrane proteins and consequences on  
812 cyclic electron flow. *Photosynth. Res.* **129**: 307-320
- 813 **Ensminger I, Busch F, Huner NPA** (2006) Photostasis and cold acclimation: sensing low  
814 temperature through photosynthesis. *Physiol. Plant*. **126**: 28-44
- 815 **Fang L, Lin HX, Low CS, Wu MH, Chow Y, Lee YK** (2012) Expression of the  
816 *Chlamydomonas reinhardtii* Sedoheptulose - 1, 7 - bisphosphatase in *Dunaliella*  
817 *bardawil* leads to enhanced photosynthesis and increased glycerol production. *Plant*  
818 *Biotechnol J* **10**: 1129-1135
- 819 **Fiehn O, Wohlgemuth G, Scholz M** (2005) Setup and annotation of metabolomic experiments  
820 by integrating biological and mass spectrometric metadata. *In* International workshop on  
821 data integration in the life sciences. Springer, pp 224-239
- 822 **Fiehn O, Wohlgemuth G, Scholz M, Kind T, Lee DY, Lu Y, Moon S, Nikolau B** (2008)  
823 Quality control for plant metabolomics: reporting MSI - compliant studies. *Plant J* **53**:  
824 691-704
- 825 **Florez-Sarasa I, Noguchi K, Araujo WL, Garcia-Nogales A, Fernie AR, Flexas J, Ribas-**  
826 **Carbo M** (2016) Impaired Cyclic Electron Flow around Photosystem I Disturbs High-  
827 Light Respiratory Metabolism. *Plant Physiol*. **172**: 2176-2189
- 828 **Gimmler H, Möller EM** (1981) Salinity - dependent regulation of starch and glycerol  
829 metabolism in *Dunaliella parva*. *Plant Cell Environ*. **4**: 367-375
- 830 **Goyal A** (2007a) Osmoregulation in *Dunaliella*, Part I: Effects of osmotic stress on  
831 photosynthesis, dark respiration and glycerol metabolism in *Dunaliella tertiolecta* and its  
832 salt-sensitive mutant (HL 25/8). *Plant Physiology and Biochemistry* **45**: 696-704
- 833 **Goyal A** (2007b) Osmoregulation in *Dunaliella*, Part II: Photosynthesis and starch contribute  
834 carbon for glycerol synthesis during a salt stress in *Dunaliella tertiolecta*. *Plant Physiol*  
835 *Biochem* **45**: 705-710
- 836 **He Y, Fu J, Yu C, Wang X, Jiang Q, Hong J, Lu K, Xue G, Yan C, James A** (2015)  
837 Increasing cyclic electron flow is related to Na<sup>+</sup> sequestration into vacuoles for salt  
838 tolerance in soybean. *J Exp Bot*: erv392
- 839 **Herrera-Valencia VA, Macario-Gonzalez LA, Casais-Molina ML, Beltran-Aguilar AG,**  
840 **Peraza-Echeverria S** (2012) In silico cloning and characterization of the glycerol-3-  
841 phosphate dehydrogenase (GPDH) gene family in the green microalga *Chlamydomonas*  
842 *reinhartii*. *Curr Microbiol* **64**: 477-485

- 843 **Horváth EM, Peter SO, Joët T, Rumeau D, Cournac L, Horváth GV, Kavanagh TA,**  
844 **Schäfer C, Peltier G, Medgyesy P** (2000) Targeted inactivation of the plastid *ndhB* gene  
845 in tobacco results in an enhanced sensitivity of photosynthesis to moderate stomatal  
846 closure. *Plant Physiol.* **123**: 1337-1350
- 847 **Huang W, Yang S-J, Zhang S-B, Zhang J-L, Cao K-F** (2012) Cyclic electron flow plays an  
848 important role in photoprotection for the resurrection plant *Paraboea rufescens* under  
849 drought stress. *Planta* **235**: 819-828
- 850 **Huang W, Zhang S-B, Xu J-C, Liu T** (2017) Plasticity in roles of cyclic electron flow around  
851 photosystem I at contrasting temperatures in the chilling-sensitive plant *Calotropis*  
852 *gigantea*. *Env Exp Bot* **141**: 145-153
- 853 **Hüner NP, Dahal K, Bode R, Kurepin LV, Ivanov AG** (2016) Photosynthetic acclimation,  
854 vernalization, crop productivity and ‘the grand design of photosynthesis’. *J Plant Physiol*  
855 **203**: 29-43
- 856 **Hüner NPA, Öquist G, Melis A** (2003) Photostasis in plants, green algae and cyanobacteria: the  
857 role of light harvesting antenna complexes. *In Advances in Photosynthesis and*  
858 *Respiration. Light Harvesting Antennas in Photosynthesis* (Green BR, Parson WW, eds).  
859 Kluwer Academic Publishers, Dordrecht, Vol 13, pp 401-421
- 860 **Hüner NPA, Öquist G, Sarhan F** (1998) Energy balance and acclimation to light and cold.  
861 *Trends Plant Sci* **3**: 224-230
- 862 **Ishikawa N, Takabayashi A, Noguchi K, Tazoe Y, Yamamoto H, von Caemmerer S, Sato F,**  
863 **Endo T** (2016) NDH-mediated cyclic electron flow around photosystem I is crucial for  
864 C4 photosynthesis. *Plant Cell Physiol* **57**: 2020-2028
- 865 **Ivanov AG, Morgan RM, Gray GR, Velitchkova MY, Hüner NP** (1998) Temperature/light  
866 dependent development of selective resistance to photoinhibition of photosystem I. *FEBS*  
867 *Lett.* **430**: 288-292
- 868 **Iwai M, Takizawa K, Tokutsu R, Okamuro A, Takahashi Y, Minagawa J** (2010) Isolation of  
869 the elusive supercomplex that drives cyclic electron flow in photosynthesis. *Nature* **464**:  
870 1210-1213
- 871 **Jeong J, Baek K, Kirst H, Melis A, Jin E** (2017) Loss of CpSRP54 function leads to a  
872 truncated light-harvesting antenna size in *Chlamydomonas reinhardtii*. *Biochim Biophys*  
873 *Acta* **1858**: 45-55
- 874 **Joliot P, Johnson GN** (2011) Regulation of cyclic and linear electron flow in higher plants. *Proc*  
875 *Natl Acad Sci USA* **108**: 13317-13322
- 876 **Kanazawa A, Kramer DM** (2002) In vivo modulation of nonphotochemical exciton quenching  
877 (NPQ) by regulation of the chloroplast ATP synthase. *Proc Natl Acad Sci USA* **99**:  
878 12789-12794
- 879 **Kind T, Wohlgemuth G, Lee DY, Lu Y, Palazoglu M, Shahbaz S, Fiehn O** (2009) FiehnLib:  
880 mass spectral and retention index libraries for metabolomics based on quadrupole and  
881 time-of-flight gas chromatography/mass spectrometry. *Anal Chem* **81**: 10038-10048
- 882 **Kramer DM, Cruz JA, Kanazawa A** (2003) Balancing the central roles of the thylakoid proton  
883 gradient. *Tren. Plant Sci.* **8**: 27-32
- 884 **Kramer DM, Evans JR** (2011) The importance of energy balance in improving photosynthetic  
885 productivity. *Plant Physiol.* **155**: 70-78
- 886 **Krause GH, Weis E** (1991) Chlorophyll fluorescence and photosynthesis: the basics. *Ann. Rev.*  
887 *Physiol. Plant Mol. Biol.* **42**: 313-349

- 888 **Laemmli UK** (1970) Cleavage of structural proteins during the assembly of the head of  
889 bacteriophage T4. *Nature* **227**: 680
- 890 **Lee DY, Fiehn O** (2008) High quality metabolomic data for *Chlamydomonas reinhardtii*. *Plant*  
891 *Meth* **4**: 7
- 892 **Lefebvre S, Lawson T, Fryer M, Zakhleniuk OV, Lloyd JC, Raines CA** (2005) Increased  
893 sedoheptulose-1, 7-bisphosphatase activity in transgenic tobacco plants stimulates  
894 photosynthesis and growth from an early stage in development. *Plant Physiol.* **138**: 451-  
895 460
- 896 **Li L, Aro E-M, Millar AH** (2018) Mechanisms of photodamage and protein turnover in  
897 photoinhibition. *Tren. Plant Sci.* **23**: 667-676
- 898 **Livingston AK, Cruz JA, Kohzuma K, Dhingra A, Kramer DM** (2010) An *Arabidopsis*  
899 mutant with high cyclic electron flow around Photosystem I (hcef) Involving the NADPH  
900 Dehydrogenase Complex. *Plant Cell* **22**: 221-233
- 901 **Lu Y, Xu J** (2015) Phytohormones in microalgae: a new opportunity for microalgal  
902 biotechnology? *Tren. Plant Sci.* **20**: 273-282
- 903 **Lucker B, Kramer DM** (2013) Regulation of cyclic electron flow in *Chlamydomonas*  
904 *reinhardtii* under fluctuating carbon availability. *Photosynth. Res.* **117**: 449-459
- 905 **Maeda H, Dudareva N** (2012) The shikimate pathway and aromatic amino acid biosynthesis in  
906 plants. *Annu Rev Plant Biol* **63**: 73-105
- 907 **Magnuson A, Cardona T** (2016) Thylakoid membrane function in heterocysts. *Biochim*  
908 *Biophys Acta* **1857**: 309-319
- 909 **Magnuson A, Krassen H, Stensjö K, Ho FM, Styring S** (2011) Modeling Photosystem I with  
910 the alternative reaction center protein PsaB2 in the nitrogen fixing cyanobacterium  
911 *Nostoc punctiforme*. *Biochim Biophys Acta* **1807**: 1152-1161
- 912 **Minagawa J** (2016) A Supercomplex of Cytochrome bf and Photosystem I for Cyclic Electron  
913 Flow. *In* *Cytochrome Complexes: Evolution, Structures, Energy Transduction, and*  
914 *Signaling*. Springer, pp 453-462
- 915 **Montero-Barrientos M, Hermosa R, Cardoza RE, Gutierrez S, Nicolas C, Monte E** (2010)  
916 Transgenic expression of the *Trichoderma harzianum* hsp70 gene increases *Arabidopsis*  
917 resistance to heat and other abiotic stresses. *J Plant Physiol* **167**: 659-665
- 918 **Morgan-Kiss R, Ivanov AG, Williams J, Mobashsher K, Hüner NP** (2002a) Differential  
919 thermal effects on the energy distribution between photosystem II and photosystem I in  
920 thylakoid membranes of a psychrophilic and a mesophilic alga. *Biochim Biophys Acta*  
921 **1561**: 251-265
- 922 **Morgan-Kiss RM, Ivanov A, Modla S, Czymmek K, Huner NPA, Priscu JC, Hanson TE**  
923 (2008) Identity and phylogeny of a new psychrophilic eukaryotic green alga, *Chlorella*  
924 sp. strain BI isolated from a transitory pond near Bratina Island, Antarctica.  
925 *Extremophiles* **12**: 701-711
- 926 **Morgan-Kiss RM, Ivanov AG, Hüner NPA** (2002b) The Antarctic psychrophile,  
927 *Chlamydomonas subcaudata*, is deficient in state I-state II transitions. *Planta* **214**: 435-  
928 445
- 929 **Morgan-Kiss RM, Ivanov AG, Pockock T, Król M, Gudynaite-Savitch L, Hüner NPA** (2005)  
930 The Antarctic psychrophile, *Chlamydomonas raudensis* Ettl (UWO241)  
931 (CHLOROPHYCEAE, CHLOROPHYTA) exhibits a limited capacity to photoacclimate  
932 to red light. *J Phycol* **41**: 791-800

- 933 **Morgan-Kiss RM, Priscu JC, Pockock T, Gudynaite-Savitch L, Huner NP** (2006) Adaptation  
934 and acclimation of photosynthetic microorganisms to permanently cold environments.  
935 *Microbiol Molec Biol Rev* **70**: 222-252
- 936 **Morgan RM, Ivanov AG, Priscu JC, Maxwell DP, Hüner NPA** (1998) Structure and  
937 composition of the photochemical apparatus of the Antarctic green alga, *Chlamydomonas*  
938 *subcaudata*. *Photosyn. Res.* **56**: 303-314
- 939 **Munekage Y, Hashimoto M, Miyake C, Tomizawa K-I, Endo T, Tasaka M, Shikanai T**  
940 (2004) Cyclic electron flow around photosystem I is essential for photosynthesis. *Nature*  
941 **429**: 579-582
- 942 **Munekage YN, Genty B, Peltier G** (2008) Effect of PGR5 impairment on photosynthesis and  
943 growth in *Arabidopsis thaliana*. *Plant Cell Physiol* **49**: 1688-1698
- 944 **Murthy HN, Lee E-J, Paek K-Y** (2014) Production of secondary metabolites from cell and  
945 organ cultures: strategies and approaches for biomass improvement and metabolite  
946 accumulation. *Plant Cell, Tissue and Organ Culture (PCTOC)* **118**: 1-16
- 947 **Nawrocki W, Bailleul B, Picot D, Cardol P, Rappaport F, Wollman F-A, Joliot P** (2019) The  
948 mechanism of cyclic electron flow. *Biochimica et Biophysica Acta (BBA)-Bioenergetics*
- 949 **Neale PJ, Priscu JC** (1990) Structure and function of the photochemical apparatus in the  
950 phytoplankton of ice-covered Lake Bonney. *Antarc. J. U.S.* **25**: 225-225
- 951 **Neale PJ, Priscu JC** (1995) The photosynthetic apparatus of phytoplankton from a perennially  
952 ice-covered Antarctic lake: acclimation to an extreme shade environment. *Plant Cell*  
953 *Physiol* **36**: 253-263
- 954 **Ouyang J, Shao X, Li J** (2000) Indole - 3 - glycerol phosphate, a branchpoint of indole - 3 -  
955 acetic acid biosynthesis from the tryptophan biosynthetic pathway in *Arabidopsis*  
956 *thaliana*. *Plant J* **24**: 327-334
- 957 **Pfannschmidt T** (2003) Chloroplast redox signals: how photosynthesis controls its own genes.  
958 *Trends Plant Sci* **8**: 33-41
- 959 **Pockock T, Vetterli A, Falk S** (2011) Evidence for phenotypic plasticity in the Antarctic  
960 extremophile *Chlamydomonas raudensis* Ettl. UWO 241. *J Exp Bot* **62**: 1169-1177
- 961 **Possmayer M, Berardi G, Beall BFN, Trick CG, Hüner NPA, Maxwell DP** (2011) Plasticity  
962 of the psychrophilic green alga *Chlamydomonas raudensis* (UWO 241) (Chlorophyta) to  
963 supraoptimal temperature stress. *J Phycol* **47**: 1098-1109
- 964 **Priscu JC, Wolf CF, Takacs CD, Fritsen CH, Laybourn-Parry J, Roberts JKM, Berry-**  
965 **Lyons W** (1999) Carbon transformations in the water column of a perennially ice-  
966 covered Antarctic Lake. *Biosci.* **49**: 997-1008
- 967 **Raymond JA, Janech MG, Fritsen CH** (2009) Novel ice-binding proteins from a psychrophilic  
968 Antarctic alga (Chlamydomonadaceae, Chlorophyceae). *J. Phycol* **45**: 130-136
- 969 **Sacksteder CA, Kramer DM** (2000) Dark-interval relaxation kinetics (DIRK) of absorbance  
970 changes as a quantitative probe of steady-state electron transfer. *Photosynth Res* **66**: 145-  
971 158
- 972 **Scheibe R** (2004) Malate valves to balance cellular energy supply. **120**: 21-26
- 973 **Shimakawa G, Shaku K, Miyake C** (2016) Oxidation of P700 in photosystem I is essential for  
974 the growth of cyanobacteria. *Plant Physiol.* **172**: 1443-1450
- 975 **Siaut M, Cuiné S, Cagnon C, Fessler B, Nguyen M, Carrier P, Beyly A, Beisson F,**  
976 **Triantaphylidès C, Li-Beisson Y** (2011) Oil accumulation in the model green alga  
977 *Chlamydomonas reinhardtii*: characterization, variability between common laboratory  
978 strains and relationship with starch reserves. *BMC Biotechnol* **11**: 7

- 979 **Steinbeck J, Ross IL, Rothnagel R, Gäbelein P, Schulze S, Giles N, Ali R, Drysdale R,**  
980 **Sierecki E, Gambin Y** (2018) Structure of a PSI–LHCI–cyt b6f supercomplex in  
981 *Chlamydomonas reinhardtii* promoting cyclic electron flow under anaerobic conditions.  
982 Proc Natl Acad Sci USA **115**: 10517-10522
- 983 **Strand DD, Livingston AK, Satoh-Cruz M, Froehlich JE, Maurino VG, Kramer DM** (2015)  
984 Activation of cyclic electron flow by hydrogen peroxide in vivo. Proc Natl Acad Sci U S  
985 A **112**: 5539-5544
- 986 **Suorsa M** (2015) Cyclic electron flow provides acclimatory plasticity for the photosynthetic  
987 machinery under various environmental conditions and developmental stages. Front Plant  
988 Sci **6**: 800
- 989 **Suzuki N, Bassil E, Hamilton JS, Inupakutika MA, Zandalinas SI, Tripathy D, Luo Y, Dion**  
990 **E, Fukui G, Kumazaki A** (2016) ABA is required for plant acclimation to a combination  
991 of salt and heat stress. PloS one **11**: e0147625
- 992 **Szyska-Mroz B. , Cvetkovska M., Smith D.R., Possmayer M., Maxwell D.P. Hüner N.P.A.**  
993 (2019) The Antarctic psychrophile, *Chlamydomonas* sp. UWO241, exhibits cold adapted  
994 protein kinases and thylakoid remodelling that confer a distinctive thylakoid protein  
995 phosphorylation pattern associated with a novel photosystem I / II energy distribution  
996 Plant Physiol. *In Press*
- 997 **Szyska-Mroz B, Pittock P, Ivanov AG, Lajoie G, Hüner NP** (2015) The Antarctic  
998 psychrophile, *Chlamydomonas* sp. UWO 241, preferentially phosphorylates a PSI-  
999 cytochrome b6/f supercomplex. Plant Physiol. **169**: 717-736
- 1000 **Szyska B, Ivanov AG, Huner NPA** (2007) Psychrophily induces differential energy  
1001 partitioning, photosystem stoichiometry and polypeptide phosphorylation in  
1002 *Chlamydomonas raudensis*. Biochim Biophys Acta **1767**: 789-800
- 1003 **Takabayashi A, Kishine M, Asada K, Endo T, Sato F** (2005) Differential use of two cyclic  
1004 electron flows around photosystem I for driving CO<sub>2</sub>-concentration mechanism in C<sub>4</sub>  
1005 photosynthesis. Proc Natl Acad Sci USA **102**: 16898-16903
- 1006 **Takahashi H, Clowez S, Wollman F-A, Vallon O, Rappaport F** (2013) Cyclic electron flow is  
1007 redox-controlled but independent of state transition. Nature Comm **4**: 1954
- 1008 **Tamoi M, Nagaoka M, Miyagawa Y, Shigeoka S** (2006) Contribution of fructose-1, 6-  
1009 bisphosphatase and sedoheptulose-1, 7-bisphosphatase to the photosynthetic rate and  
1010 carbon flow in the Calvin cycle in transgenic plants. Plant Cell Physiol **47**: 380-390
- 1011 **Terashima M, Petroustos D, Hüdig M, Tolstygina I, Trompelt K, Gäbelein P, Fufezan C,**  
1012 **Kudla J, Weinl S, Finazzi G** (2012) Calcium-dependent regulation of cyclic  
1013 photosynthetic electron transfer by a CAS, ANR1, and PGRL1 complex. Proc Natl Acad  
1014 Sci USA **109**: 17717-17722
- 1015 **Thalman M, Pazmino D, Seung D, Horrer D, Nigro A, Meier T, Kölling K, Pfeifhofer**  
1016 **HW, Zeeman SC, Santelia D** (2016) Regulation of leaf starch degradation by abscisic  
1017 acid is important for osmotic stress tolerance in plants. Plant Cell **28**: 1860-1878
- 1018 **Tohge T, Watanabe M, Hoefgen R, Fernie AR** (2013) Shikimate and phenylalanine  
1019 biosynthesis in the green lineage. Front Plant Sci **4**: 62
- 1020 **Tzin V, Galili G** (2010) The biosynthetic pathways for shikimate and aromatic amino acids in  
1021 *Arabidopsis thaliana*. The Arabidopsis book/American Society of Plant Biologists **8**
- 1022 **Valledor L, Weckwerth W** (2014) An improved detergent-compatible gel-fractionation  
1023 LC-LTQ-Orbitrap-MS workflow for plant and microbial proteomics. *In* Plant  
1024 Proteomics. Springer, pp 347-358



- 1025 **van den Berg RA, Hoefsloot HC, Westerhuis JA, Smilde AK, van der Werf MJ** (2006)  
1026 Centering, scaling, and transformations: improving the biological information content of  
1027 metabolomics data. *BMC Gen* **7**: 142
- 1028 **Vanneste S, Friml J** (2013) Calcium: the missing link in auxin action. *Plants* **2**: 650-675
- 1029 **Wang X, Chang L, Wang B, Wang D, Li P, Wang L, Yi X, Huang Q, Peng M, Guo A** (2013)  
1030 Comparative proteomics of *Thellungiella halophila* leaves from plants subjected to  
1031 salinity reveals the importance of chloroplastic starch and soluble sugars in halophyte salt  
1032 tolerance. *Molec Cell Prot* **12**: 2174-2195
- 1033 **Wang X, Liu W, Xin C, Zheng Y, Cheng Y, Sun S, Li R, Zhu XG, Dai SY, Rentzepis PM,**  
1034 **Yuan JS** (2016) Enhanced limonene production in cyanobacteria reveals photosynthesis  
1035 limitations. *Proc Natl Acad Sci USA*. **113**: 14225-14230
- 1036 **Xu T, Venable J, Park SK, Cociorva D, Lu B, Liao L, Wohlschlegel J, Hewel J, Yates III J**  
1037 (2006) ProLuCID, a fast and sensitive tandem mass spectra-based protein identification  
1038 program. *In Molecular & cellular proteomics*, Vol 5. Amer Soc Biochemistry Molecular  
1039 Biology Inc, pp S174-S174
- 1040 **Yamori W, Makino A, Shikanai T** (2016) A physiological role of cyclic electron transport  
1041 around photosystem I in sustaining photosynthesis under fluctuating light in rice.  
1042 *Scientific Reports* **6**: 1-12
- 1043 **Yang T, Liu Q, Kloss B, Bruni R, Kalathur RC, Guo Y, Kloppmann E, Rost B, Colecraft**  
1044 **HM, Hendrickson WAJS** (2014) Structure and selectivity in bestrophin ion channels.  
1045 **346**: 355-359
- 1046 **Zhang R, Cruz JA, Kramer DM, Magallanes-Lundback ME, Dellapenna D, Sharkey TD**  
1047 (2009) Moderate heat stress reduces the pH component of the transthylakoid proton  
1048 motive force in light - adapted, intact tobacco leaves. *Plant Cell Environ*. **32**: 1538-1547
- 1049

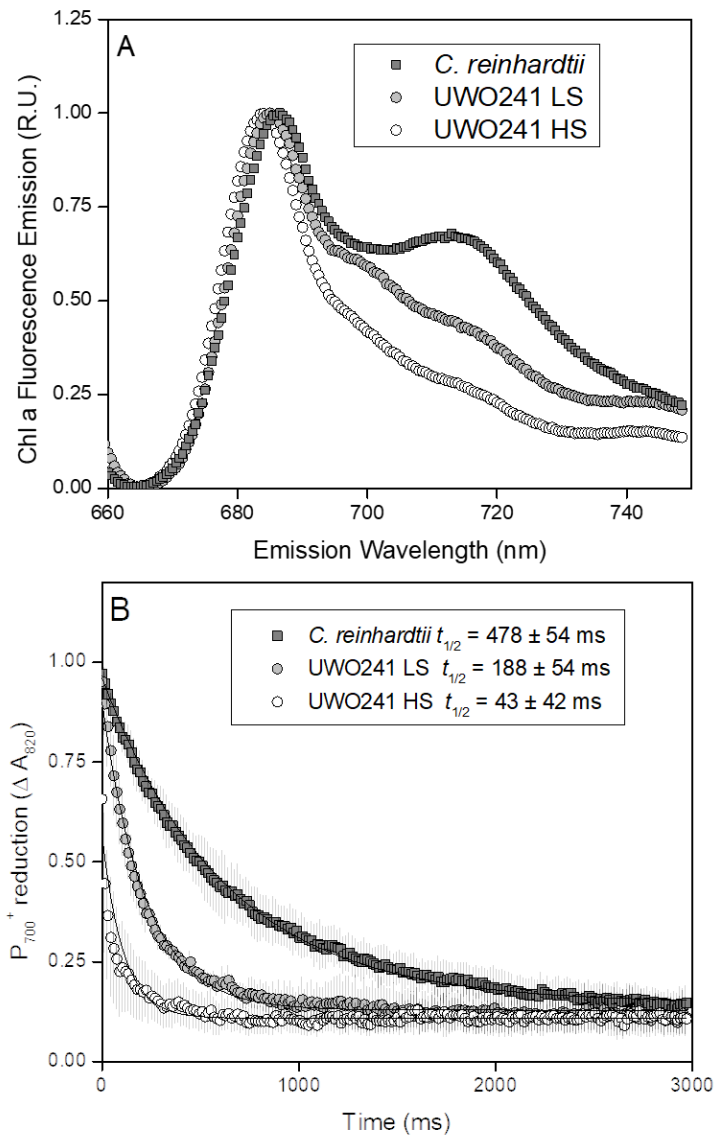

1050

1051 **Figure 1. Properties of photosystem I in *C. sp.* UWO241 compared to the model mesophile**

1052 ***C.reinhardtii*.** Low temperature (77K) chlorophyll a fluorescence emission spectra of whole

1053 cells of *C. reinhardtii* and *C. sp.* UWO241 (A). P700 re-reduction kinetics. *C. reinhardtii* was

1054 grown in low salt BBM medium at 20°C/100 μmol m<sup>-2</sup>s<sup>-1</sup> (B). UWO241 was grown in either

1055 BBM (low salt, LS) or BBM+700 mM NaCl (High salt, HS), and 8°C/100 μmol m<sup>-2</sup>s<sup>-1</sup>. t<sub>1/2</sub>, half-

1056 time for P700 re-reduction.

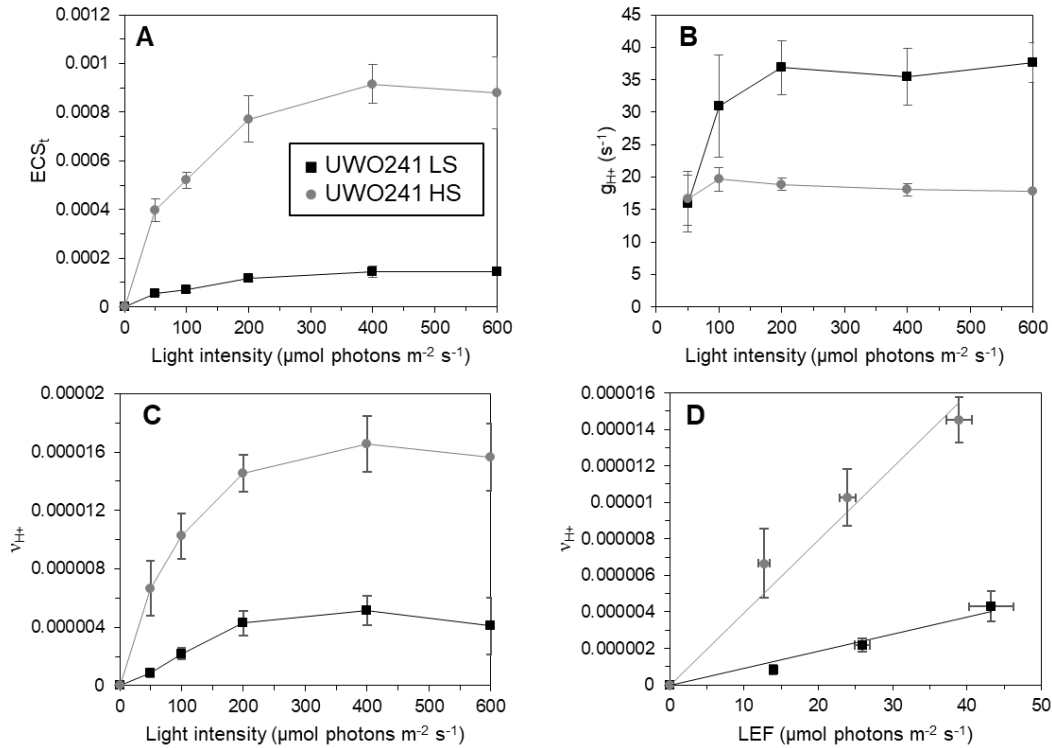

1057

1058 **Figure 2. Photosynthetic properties of *C. sp. UWO241* under various light intensities using**

1059 **Electrochromic shift.** The ECS<sub>t</sub> (total amplitude of ECS, proportional to proton motive force, A),

1060  $g_{\text{H}^+}$  (proton conductance, reflecting the ATP synthesis activities, B) and  $v_{\text{H}^+}$  (proton flux rates, C)

1061 of *C. sp. UWO241* grown in low-salt (black, squares) and high-salt (grey, circles) were measured

1062 from dark interval relaxation kinetics (DIRK). The relationship between  $v_{\text{H}^+}$  and LEF (measured

1063 by chlorophyll fluorescence, see supplemental Figure S2) were assessed in *C. sp. UWO241* (D).

1064

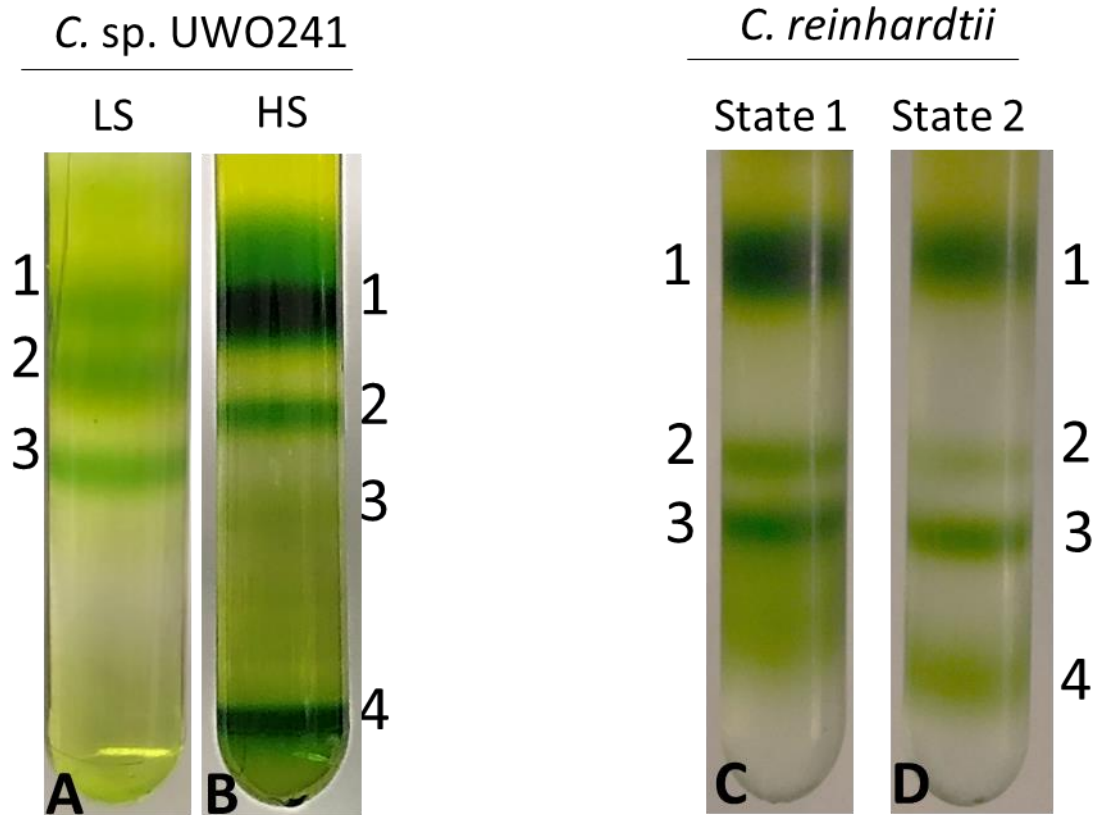

1065

1066 **Figure 3. Supercomplex formation in *C. sp. UWO241* vs. *C. reinhardtii*.** Fractionation of  
1067 major thylakoid chlorophyll-protein complexes from *C. sp. UWO241* by sucrose density  
1068 ultracentrifugation from low salt (LS) - and high salt (HS)- grown cultures (A, B). Fractionation  
1069 of major thylakoid chlorophyll-protein complexes from *C. reinhardtii* exposed to State 1 and  
1070 State 2 conditions (C, D). Cultures of *C. reinhardtii* were grown under control conditions  
1071 (20°C/100  $\mu\text{mol}$ ) and either dark adapted for 10 minutes (State 1, C) or incubated under  
1072 anaerobic conditions for 30 minutes (State 2, D).

1073

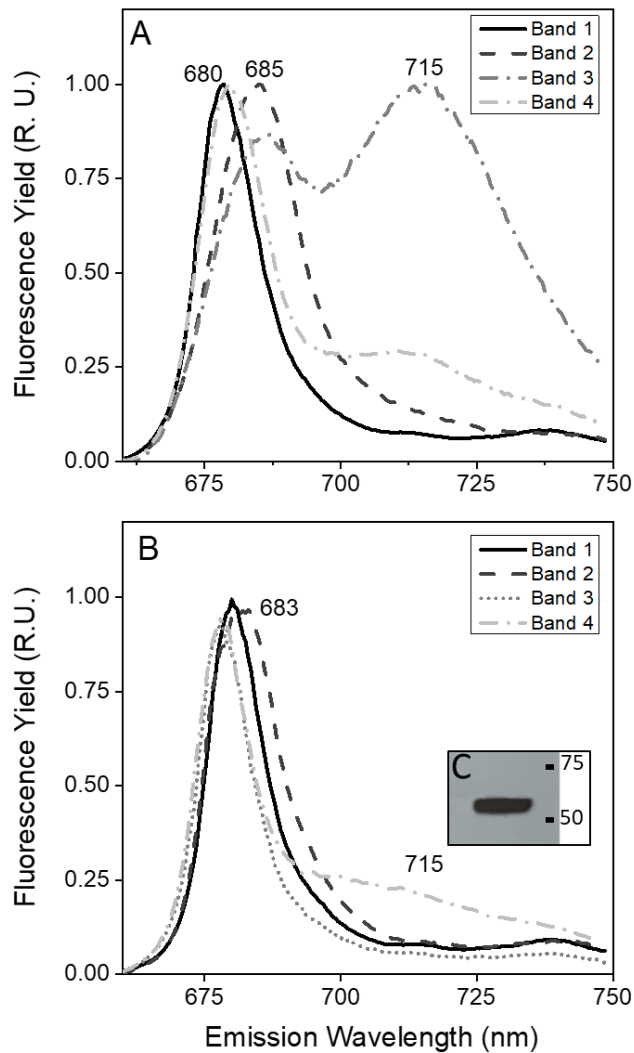

1074

1075 **Figure 4. 77K fluorescence emission spectra of Chl-protein complexes from *C.reinhardtii***

1076 **and *C. sp. UWO241*.** Low temperature Chl a fluorescence emission spectra of pigment-protein

1077 bands isolated from sucrose density gradients shown in Figure 3. Low temperature Chl a

1078 emission spectra of bands from *C. reinhardtii* State II conditions (A). Emission spectra of bands

1079 from high salt cultures of *C. sp. UWO241* (B). Immunoblot of the UWO241-SC band with PsaA

1080 antibody (C). Spectra represent normalized data and the average of 3 scans.

1081

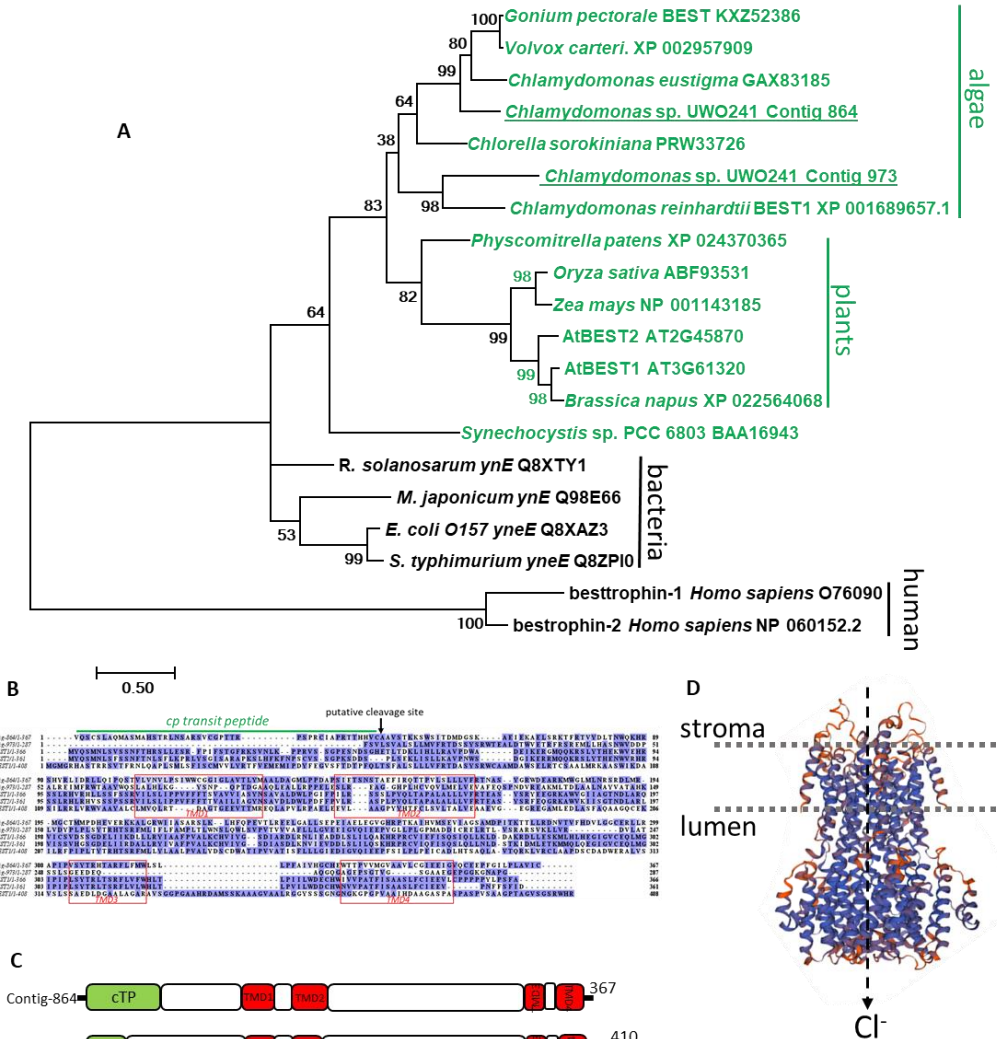

1082  
 1083 **Figure 5. Expression of a Bestrophin-like transporter in UWO241.** Maximum likelihood tree  
 1084 of the BEST1 homologue identified in the UWO241 transcriptome from HS-grown cultures (A).  
 1085 Numbers are bootstrap values from 500 replicate trees. Protein alignment of BEST proteins (B).  
 1086 Protein schematics for putative *C. sp.* UWO241 BEST protein (contig 367) and *A. thaliana* Best1  
 1087 (C) (Duan et al., 2016). Green and orange blocks indicate putative chloroplastic transit peptides  
 1088 and trans-membrane domains, respectively. Predicted tertiary structure of UWO241 BEST  
 1089 channel generated by SwissModel (<https://swissmodel.expasy.org/>) using *Klebsiella*  
 1090 *pneumoniae* Best complex as a template (D).

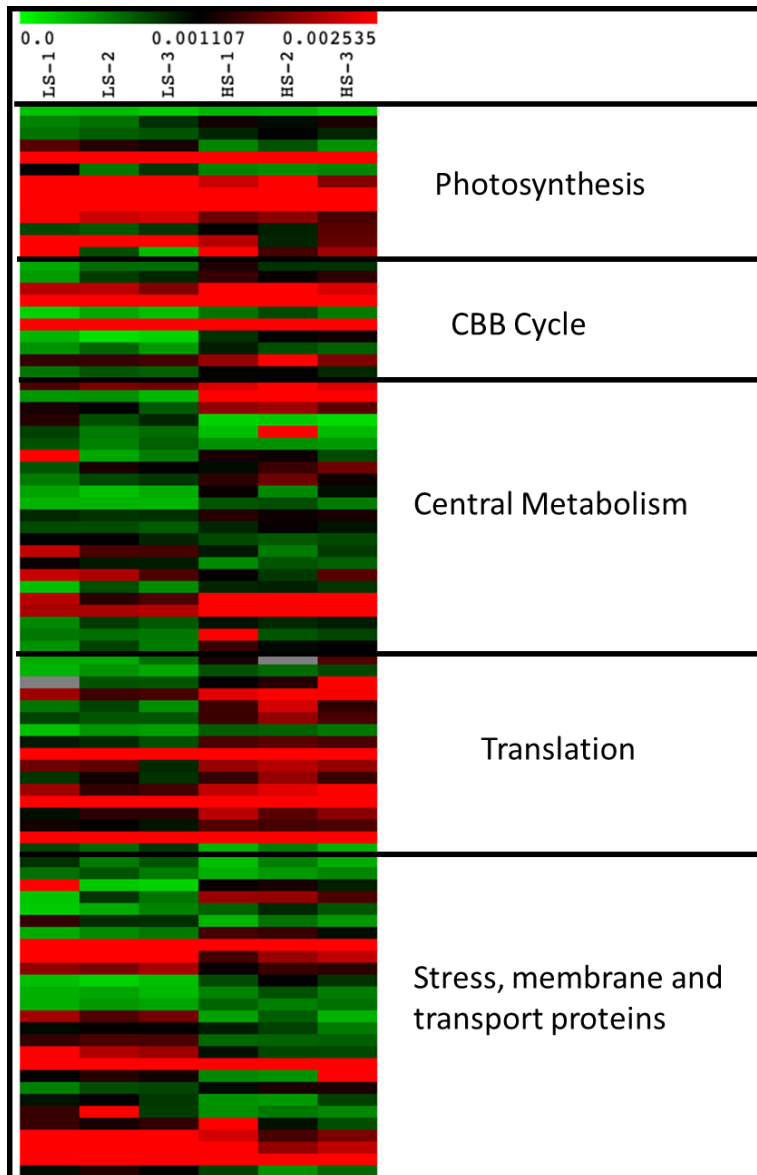

1091

1092 **Figure 6. Heat map of differentially regulated proteins in UWO241 under low (LS) and**  
1093 **high salinity (HS) conditions.** The normalized spectral abundance factor (NSAF) values are  
1094 plotted for each replicate in the two conditions (n=3) using color based approach (green: low  
1095 abundance, red: high abundance). The proteins are categorized into broad processes they belong  
1096 to.

1097





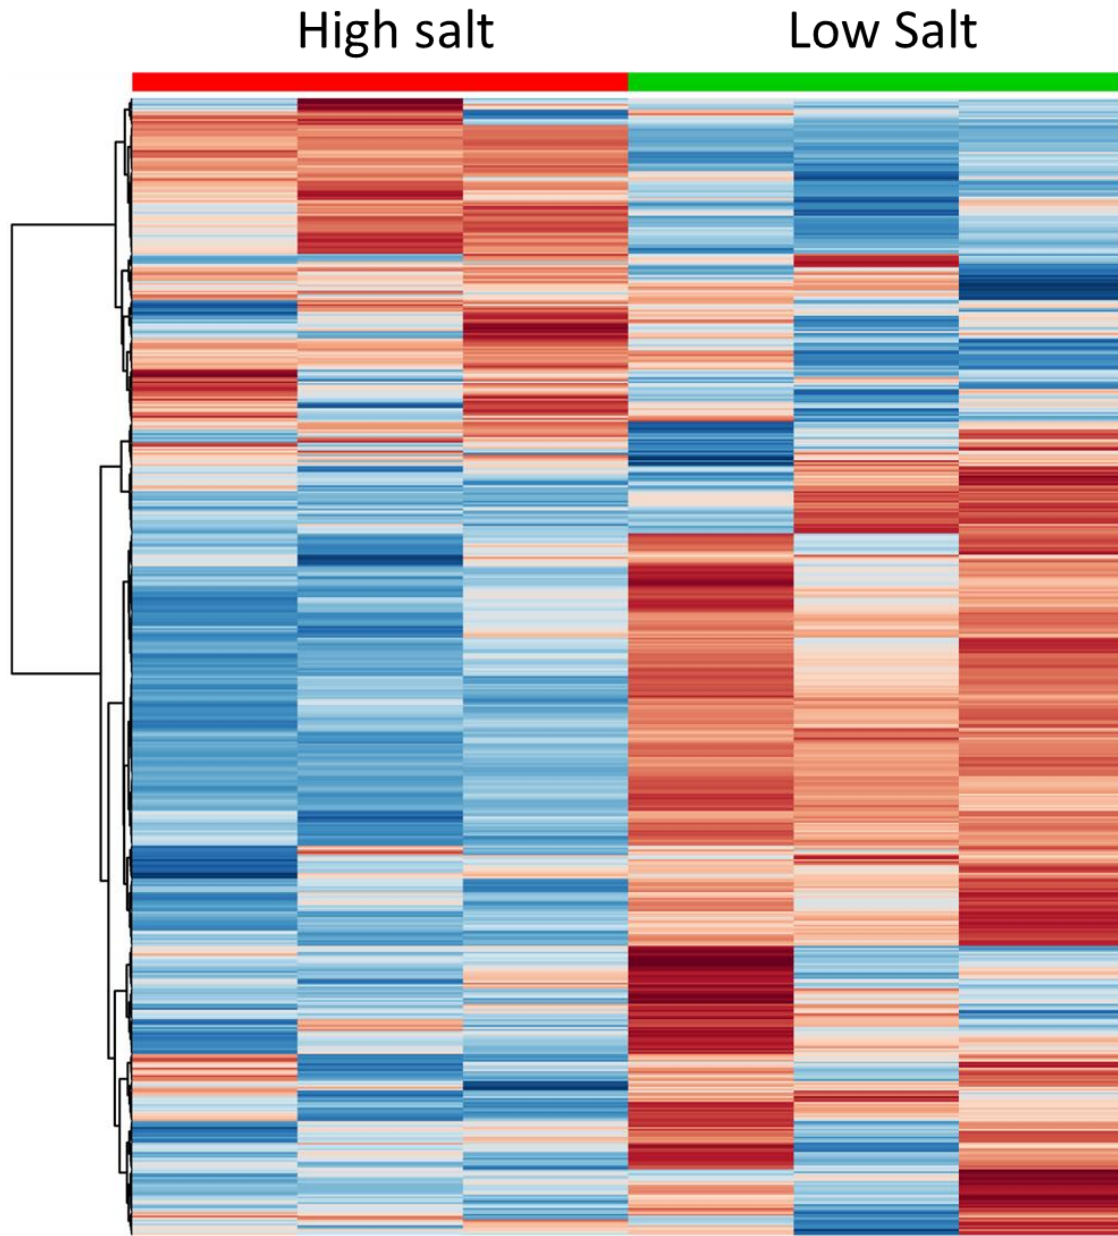

1107

1108 **Figure 8. Heat map showing the relative changes in primary metabolite abundances in *C.***

1109 **sp. UWO241 cultures grown under high or low salt conditions.** The analysis includes all

1110 quantified metabolites. For each growth condition, three biological replicates are represented

1111 using a color-based metabolite profile as indicated (red – high abundance; blue – low

1112 abundance). Hierarchical clustering is based on Euclidean distances and Ward's linkage

1113

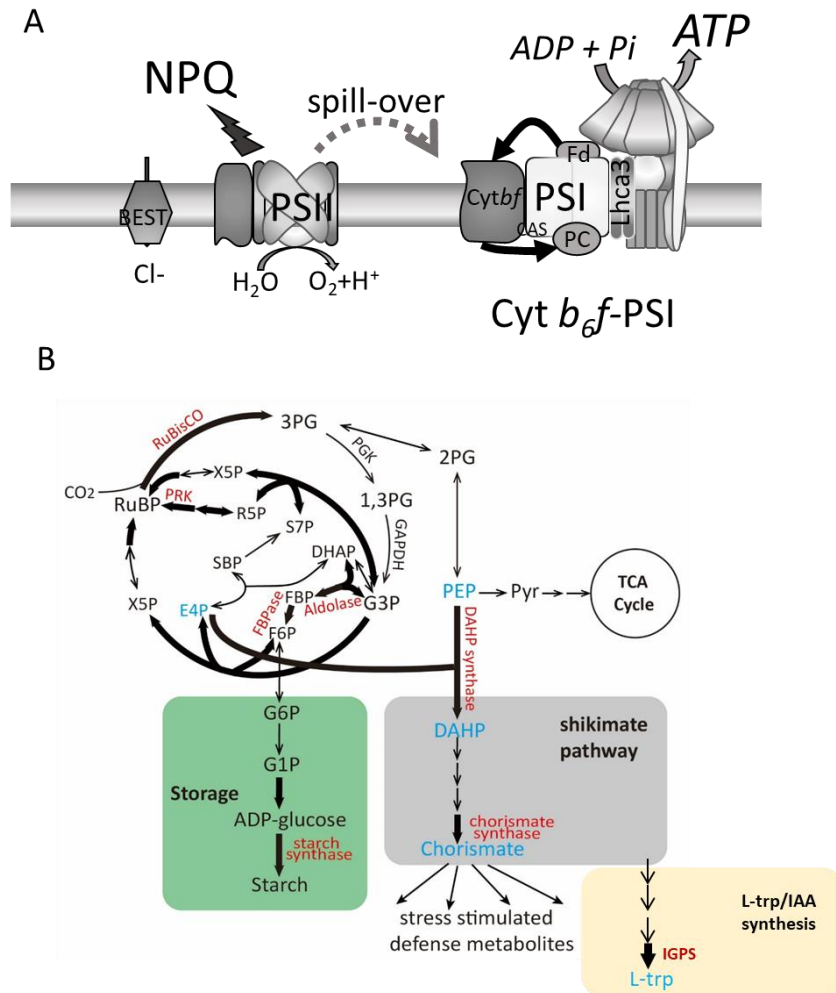

1114

1115 **Figure 9. A restructured photosynthetic apparatus supports rewiring of central**

1116 **metabolism in *C. sp. UWO241*.** The photosynthetic apparatus of UWO241 is assembled to

1117 promoted high rates of CEF which is sustained by formation of a PSI supercomplex (A). CEF

1118 supports photoprotection of PSII and PSI and provides additional ATP for downstream

1119 metabolism. High ATP is consumed, in part, by the CBB cycle as well as an upregulated

1120 shikimate pathway and carbon storage pathways (starch, glycerol) (B). Model is based on data

1121 presented here and other studies (Cook et al., 2019; Szyszka-Mroz et al., 2015; 2019)

1122

1123

1124 **Table 1. The UWO241 supercomplex contains subunits of PSI, Cytb<sub>6</sub>f, ATP synthase, as**  
 1125 **well as several antenna proteins.** Proteomic analysis of Band 4 isolated from cultures  
 1126 acclimated to high salinity (700 mM NaCl). NSAF (percent normalized spectral abundance  
 1127 factor) for selected proteins are shown.

| Protein                         | NSAF (%) | UniProtKB | Organism              |
|---------------------------------|----------|-----------|-----------------------|
| <b>PSI</b>                      |          |           |                       |
| <b>PsaD</b>                     | 4.53     | Q39615    | <i>C. reinhardtii</i> |
| <b>PsaE</b>                     | 4.24     | P12356    | <i>C.reinhardtii</i>  |
| <b>PsaF</b>                     | 3.12     | P12356    | <i>C.reinhardtii</i>  |
| <b>PsaH</b>                     | 1.84     | P13352    | <i>C. reinhardtii</i> |
| <b>PsaK</b>                     | 6.13     | P14225    | <i>C. reinhardtii</i> |
| <b>PsaL</b>                     | 2.43     | Q39654    | <i>C. sativus</i>     |
| <b>LHCI &amp; LHCII Antenna</b> |          |           |                       |
| <b>Lhca3</b>                    | 1.35     | Q9SY97    | <i>A. thaliana</i>    |
| <b>Lhca5</b>                    | 2.82     | Q9C639    | <i>A. thaliana</i>    |
| <b>CP29</b>                     | 2.25     | Q93WD2    | <i>C. reinhardtii</i> |
| <b>LHCII type I</b>             | 2.22     | P20866    | <i>P. patens</i>      |
| <b>CB2</b>                      | 9.46     | P14273    | <i>C.reinhardtii</i>  |
| <b>Cyt b<sub>6</sub>f</b>       |          |           |                       |
| <b>PetA</b>                     | 5.35     | P23577    | <i>C. reinhardtii</i> |
| <b>PetB</b>                     | 2.33     | Q00471    | <i>C. reinhardtii</i> |
| <b>PetC</b>                     | 1.15     | P49728    | <i>C.reinhardtii</i>  |
| <b>ATP Synthase</b>             |          |           |                       |
| <b>AtpA</b>                     | 2.45     | P26526    | <i>C. reinhardtii</i> |
| <b>AtpB</b>                     | 2.07     | P06541    | <i>C. reinhardtii</i> |
| <b>Other</b>                    |          |           |                       |
| <b>CAS</b>                      | 4.65     | Q9FN48    | <i>A. thaliana</i>    |
| <b>FtsH1</b>                    | 0.49     | Q5Z974    | <i>O. sativa</i>      |
| <b>FtsH2</b>                    | 1.26     | O80860    | <i>A. thaliana</i>    |
| <b>PsbP</b>                     | 2.52     | P11471    | <i>C. reinhardtii</i> |

1128

1129
